# Supplementary material for: Genetic Variability of the Functional Domains of Chromodomains Helicase DNA-Binding (CHD) Proteins
Source: MDPI journal article supplement (doi:10.3390/genes12111827), 2021-11-19
Supplement: s1 [file s1]

# Supplementary materials

## Genetic variability of the functional domains of Chromodomains Helicase DNA-Binding (CHD) proteins

**Ana R. Cardoso<sup>1,2,3</sup>, Mónica Lopes-Marques<sup>1,2,3</sup>, Manuela Oliveira<sup>1,2,3</sup>, António Amorim<sup>1,2,3</sup>, Maria João Prata<sup>1,2,3</sup>, Luísa Azevedo<sup>1,2,3</sup>**

<sup>1</sup> i3s- Instituto de Investigação e Inovação em Saúde, Universidade do Porto, Population Genetics and Evolution Group, Rua Alfredo Allen 208, 4200-135 Porto, Portugal

<sup>2</sup> IPATIMUP-Institute of Molecular Pathology and Immunology, University of Porto, Rua Júlio Amaral de Carvalho 45, 4200-135 Porto, Portugal

<sup>3</sup> Department of Biology, Faculty of Sciences, University of Porto, Rua do Campo Alegre, s/n, 4169-007 Porto, Portugal

**Table S1-** Accession numbers of CHD protein sequences used in the phylogenetic tree. The human canonical transcripts were retrieved from UniProt [48].

| <b>Protein</b> | <b><i>Homo sapiens</i></b> | <b><i>Pan troglodytes</i></b> | <b><i>Macaca mulatta</i></b> | <b><i>Felis catus</i></b> | <b><i>Rattus norvegicus</i></b> | <b><i>Mus musculus</i></b> |
|----------------|----------------------------|-------------------------------|------------------------------|---------------------------|---------------------------------|----------------------------|
| <b>CHD1</b>    | NP_001261.2                | XP_517850.3                   | XP_001097125.1               | XP_023114504.1            | NP_001100935.1                  | NP_031716.2                |
| <b>CHD2</b>    | NP_001262.3                | XP_003952781.2                | XP_028707159.1               | XP_011281040.2            | NP_001100993.1                  | NP_001074814.2             |
| <b>CHD3</b>    | NP_001005273.1             | XP_003339343.1                | NP_001361419.1               | XP_023099697.1            | XP_017453283.1                  | NP_666131.3                |
| <b>CHD4</b>    | NP_001264.2                | XP_016778332.1                | XP_028685032.1               | XP_023112488.1            | XP_006237463.1                  | XP_006505349.1             |
| <b>CHD5</b>    | NP_056372.1                | XP_016808514.1                | XP_014996210.2               | XP_023113778.1            | NP_001258155.1                  | NP_001074845.1             |
| <b>CHD6</b>    | NP_115597.3                | XP_016793413.1                | XP_015004487.1               | XP_019682057.1            | XP_008760567.1                  | NP_775544.2                |
| <b>CHD7</b>    | NP_060250.2                | XP_016815001.2                | XP_015000905.1               | XP_023104204.1            | NP_001101376.2                  | NP_001264078.1             |
| <b>CHD8</b>    | NP_001164100.1             | XP_003314292.2                | XP_028707218.1               | XP_019688333.1            | NP_001334590.1                  | NP_963999.2                |
| <b>CHD9</b>    | NP_001295248.1             | XP_016785317.1                | XP_014981612.2               | XP_023100872.1            | XP_002725429.2                  | NP_001297459.1             |

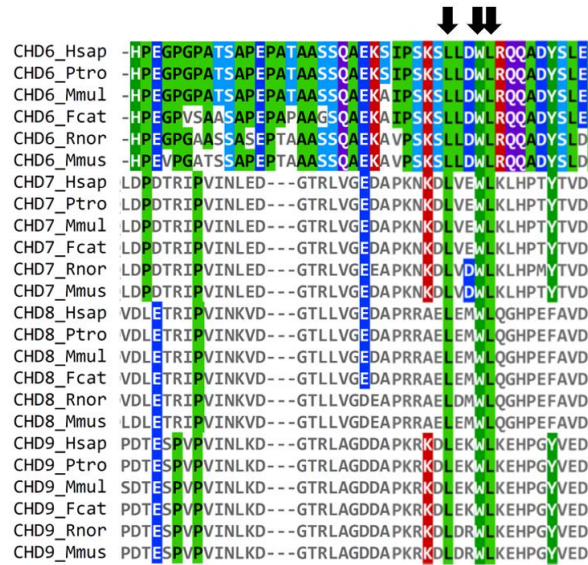

**Figure S1-** Multiple sequence alignment scheme of the first Brahma and Kismet (BRK) domain among group III chromodomains helicase-DNA binding (CHD) protein orthologues (CHD6, CHD7, CHD8 and CHD9). The coloring scheme represents the variable amino acid positions after using the multiple alignment viewer MView [62]. The black arrows represent the conserved positions among the sequences of this domain.

## GROUP I

### Chromo 1 (CHD1)

Hsap\_CHD1 ETIERFMDCRIGRKATGATTTIYA<sup>1</sup>VEADGDPNAGFE<sup>2</sup>KNKEPGEI<sup>3</sup>QYL<sup>4</sup>IKWK<sup>5</sup>GW<sup>6</sup>SHI<sup>7</sup>HT<sup>8</sup>WE<sup>9</sup>TE<sup>10</sup>ETL<sup>11</sup>KQ<sup>12</sup>QNV<sup>13</sup>RG<sup>14</sup>MK<sup>15</sup>KL<sup>16</sup>DNY<sup>17</sup>KK<sup>18</sup>Q<sup>19</sup>ET<sup>20</sup>KRW<sup>21</sup>LK<sup>22</sup>  
Ptro\_CHD1 ETIERFMDCRIGRKATGATTTIYA<sup>1</sup>VEADGDPNAGFE<sup>2</sup>KNKEPGEI<sup>3</sup>QYL<sup>4</sup>IKWK<sup>5</sup>GW<sup>6</sup>SHI<sup>7</sup>HT<sup>8</sup>WE<sup>9</sup>TE<sup>10</sup>ETL<sup>11</sup>KQ<sup>12</sup>QNV<sup>13</sup>RG<sup>14</sup>MK<sup>15</sup>KL<sup>16</sup>DNY<sup>17</sup>KK<sup>18</sup>Q<sup>19</sup>ET<sup>20</sup>KRW<sup>21</sup>LK<sup>22</sup>  
Mmul\_CHD1 ETIERFMDCRIGRKATGATTTIYA<sup>1</sup>VEADGDPNAGFE<sup>2</sup>KNKEPGEI<sup>3</sup>QYL<sup>4</sup>IKWK<sup>5</sup>GW<sup>6</sup>SHI<sup>7</sup>HT<sup>8</sup>WE<sup>9</sup>TE<sup>10</sup>ETL<sup>11</sup>KQ<sup>12</sup>QNV<sup>13</sup>RG<sup>14</sup>MK<sup>15</sup>KL<sup>16</sup>DNY<sup>17</sup>KK<sup>18</sup>Q<sup>19</sup>ET<sup>20</sup>KRW<sup>21</sup>LK<sup>22</sup>  
Fcat\_CHD1 ETIERFMDCRIGRKATGATTTIYA<sup>1</sup>VEADGDPNAGFE<sup>2</sup>KNKEPGEI<sup>3</sup>QYL<sup>4</sup>IKWK<sup>5</sup>GW<sup>6</sup>SHI<sup>7</sup>HT<sup>8</sup>WE<sup>9</sup>TE<sup>10</sup>ETL<sup>11</sup>KQ<sup>12</sup>QNV<sup>13</sup>RG<sup>14</sup>MK<sup>15</sup>KL<sup>16</sup>DNY<sup>17</sup>KK<sup>18</sup>Q<sup>19</sup>ET<sup>20</sup>KRW<sup>21</sup>LK<sup>22</sup>  
Rnor\_CHD1 ETIERFMDCRVGRKATGATTTIYA<sup>1</sup>VEADGDPNAGFE<sup>2</sup>KSKEPGDV<sup>3</sup>QYL<sup>4</sup>IKWK<sup>5</sup>GW<sup>6</sup>SHI<sup>7</sup>HT<sup>8</sup>WE<sup>9</sup>TE<sup>10</sup>ETL<sup>11</sup>KQ<sup>12</sup>QNV<sup>13</sup>RG<sup>14</sup>MK<sup>15</sup>KL<sup>16</sup>DNY<sup>17</sup>KK<sup>18</sup>Q<sup>19</sup>ET<sup>20</sup>KRW<sup>21</sup>LK<sup>22</sup>  
Mmus\_CHD1 ETIERVMDCRVGRKATGATTTIYA<sup>1</sup>VEADGDPNAGFE<sup>2</sup>RNKEPGDI<sup>3</sup>QYL<sup>4</sup>IKWK<sup>5</sup>GW<sup>6</sup>SHI<sup>7</sup>HT<sup>8</sup>WE<sup>9</sup>TE<sup>10</sup>ETL<sup>11</sup>KQ<sup>12</sup>QNV<sup>13</sup>RG<sup>14</sup>MK<sup>15</sup>KL<sup>16</sup>DNY<sup>17</sup>KK<sup>18</sup>Q<sup>19</sup>ET<sup>20</sup>KRW<sup>21</sup>LK<sup>22</sup>

### Chromo 2 (CHD1)

Hsap\_CHD1 QIVERIIAHSNQKSAAGY<sup>1</sup>PDY<sup>2</sup>YCKW<sup>3</sup>QGLPY<sup>4</sup>SECS<sup>5</sup>WEDGAL<sup>6</sup>ISK<sup>7</sup>KFQ<sup>8</sup>ACIDEY<sup>9</sup>FSRNQ<sup>10</sup>SKTTP<sup>11</sup>PFK<sup>12</sup>  
Ptro\_CHD1 QIVERIIAHSNQKSAAGY<sup>1</sup>PDY<sup>2</sup>YCKW<sup>3</sup>QGLPY<sup>4</sup>SECS<sup>5</sup>WEDGAL<sup>6</sup>ISK<sup>7</sup>KFQ<sup>8</sup>ACIDEY<sup>9</sup>FSRNQ<sup>10</sup>SKTTP<sup>11</sup>PFK<sup>12</sup>  
Mmul\_CHD1 QIVERIIAHSNQKSAAGY<sup>1</sup>PDY<sup>2</sup>YCKW<sup>3</sup>QGLPY<sup>4</sup>SECS<sup>5</sup>WEDGAL<sup>6</sup>ISK<sup>7</sup>KFQ<sup>8</sup>ACIDEY<sup>9</sup>FSRNQ<sup>10</sup>SKTTP<sup>11</sup>PFK<sup>12</sup>  
Fcat\_CHD1 QIVERIIAHSNQKSAAGY<sup>1</sup>PDY<sup>2</sup>YCKW<sup>3</sup>QGLPY<sup>4</sup>SECS<sup>5</sup>WEDGAL<sup>6</sup>ISK<sup>7</sup>KFQ<sup>8</sup>ACIDEY<sup>9</sup>FSRNQ<sup>10</sup>SKTTP<sup>11</sup>PFK<sup>12</sup>  
Rnor\_CHD1 QIVERIIAHSNQKSAAGLPD<sup>1</sup>Y<sup>2</sup>YCKW<sup>3</sup>QGLPY<sup>4</sup>SECS<sup>5</sup>WEDGAL<sup>6</sup>ISK<sup>7</sup>KFQ<sup>8</sup>TCIDEY<sup>9</sup>FSRNQ<sup>10</sup>SKTTP<sup>11</sup>PFK<sup>12</sup>  
Mmus\_CHD1 QIVERIIAHSNQKSAAGLPD<sup>1</sup>Y<sup>2</sup>YCKW<sup>3</sup>QGLPY<sup>4</sup>SECS<sup>5</sup>WEDGAL<sup>6</sup>ISK<sup>7</sup>KFQ<sup>8</sup>TCIDEY<sup>9</sup>FSRNQ<sup>10</sup>SKTTP<sup>11</sup>PFK<sup>12</sup>

### Helicase ATP-Binding (CHD1)

Hsap\_CHD1 AHSWCKGN<sup>1</sup>SC<sup>2</sup>ILADEM<sup>3</sup>LGK<sup>4</sup>TIQ<sup>5</sup>TISFL<sup>6</sup>NYLF<sup>7</sup>FHEH<sup>8</sup>QLYG<sup>9</sup>PF<sup>10</sup>L<sup>11</sup>LV<sup>12</sup>VL<sup>13</sup>ST<sup>14</sup>LT<sup>15</sup>SWQ<sup>16</sup>REIQT<sup>17</sup>WASQ<sup>18</sup>MNAV<sup>19</sup>VYL<sup>20</sup>GDINS<sup>21</sup>RNMIR<sup>22</sup>THEW<sup>23</sup>TH<sup>24</sup>HQ<sup>25</sup>TK<sup>26</sup>RLK<sup>27</sup>  
Ptro\_CHD1 AHSWCKGN<sup>1</sup>SC<sup>2</sup>ILADEM<sup>3</sup>LGK<sup>4</sup>TIQ<sup>5</sup>TISFL<sup>6</sup>NYLF<sup>7</sup>FHEH<sup>8</sup>QLYG<sup>9</sup>PF<sup>10</sup>L<sup>11</sup>LV<sup>12</sup>VL<sup>13</sup>ST<sup>14</sup>LT<sup>15</sup>SWQ<sup>16</sup>REIQT<sup>17</sup>WASQ<sup>18</sup>MNAV<sup>19</sup>VYL<sup>20</sup>GDINS<sup>21</sup>RNMIR<sup>22</sup>THEW<sup>23</sup>TH<sup>24</sup>HQ<sup>25</sup>TK<sup>26</sup>RLK<sup>27</sup>  
Mmul\_CHD1 AHSWCKGN<sup>1</sup>SC<sup>2</sup>ILADEM<sup>3</sup>LGK<sup>4</sup>TIQ<sup>5</sup>TISFL<sup>6</sup>NYLF<sup>7</sup>FHEH<sup>8</sup>QLYG<sup>9</sup>PF<sup>10</sup>L<sup>11</sup>LV<sup>12</sup>VL<sup>13</sup>ST<sup>14</sup>LT<sup>15</sup>SWQ<sup>16</sup>REIQT<sup>17</sup>WASQ<sup>18</sup>MNAV<sup>19</sup>VYL<sup>20</sup>GDINS<sup>21</sup>RNMIR<sup>22</sup>THEW<sup>23</sup>TH<sup>24</sup>HQ<sup>25</sup>TK<sup>26</sup>RLK<sup>27</sup>  
Fcat\_CHD1 AHSWCKGN<sup>1</sup>SC<sup>2</sup>ILADEM<sup>3</sup>LGK<sup>4</sup>TIQ<sup>5</sup>TISFL<sup>6</sup>NYLF<sup>7</sup>FHEH<sup>8</sup>QLYG<sup>9</sup>PF<sup>10</sup>L<sup>11</sup>LV<sup>12</sup>VL<sup>13</sup>ST<sup>14</sup>LT<sup>15</sup>SWQ<sup>16</sup>REIQT<sup>17</sup>WASQ<sup>18</sup>MNAV<sup>19</sup>VYL<sup>20</sup>GDINS<sup>21</sup>RNMIR<sup>22</sup>THEW<sup>23</sup>TH<sup>24</sup>HQ<sup>25</sup>TK<sup>26</sup>RLK<sup>27</sup>  
Rnor\_CHD1 AHSWCKGN<sup>1</sup>SC<sup>2</sup>ILADEM<sup>3</sup>LGK<sup>4</sup>TIQ<sup>5</sup>TISFL<sup>6</sup>NYLF<sup>7</sup>FHEH<sup>8</sup>QLYG<sup>9</sup>PF<sup>10</sup>L<sup>11</sup>LV<sup>12</sup>VL<sup>13</sup>ST<sup>14</sup>LT<sup>15</sup>SWQ<sup>16</sup>REIQT<sup>17</sup>WASQ<sup>18</sup>MNAV<sup>19</sup>VYL<sup>20</sup>GDINS<sup>21</sup>RNMIR<sup>22</sup>THEW<sup>23</sup>TH<sup>24</sup>HQ<sup>25</sup>TK<sup>26</sup>RLK<sup>27</sup>  
Mmus\_CHD1 AHSWCKGN<sup>1</sup>SC<sup>2</sup>ILADEM<sup>3</sup>LGK<sup>4</sup>TIQ<sup>5</sup>TISFL<sup>6</sup>NYLF<sup>7</sup>FHEH<sup>8</sup>QLYG<sup>9</sup>PF<sup>10</sup>L<sup>11</sup>LV<sup>12</sup>VL<sup>13</sup>ST<sup>14</sup>LT<sup>15</sup>SWQ<sup>16</sup>REIQT<sup>17</sup>WASQ<sup>18</sup>MNAV<sup>19</sup>VYL<sup>20</sup>GDINS<sup>21</sup>RNMIR<sup>22</sup>THEW<sup>23</sup>TH<sup>24</sup>HQ<sup>25</sup>TK<sup>26</sup>RLK<sup>27</sup>

Hsap\_CHD1 FNILL<sup>1</sup>TTYE<sup>2</sup>ILL<sup>3</sup>KDKA<sup>4</sup>FL<sup>5</sup>GGL<sup>6</sup>NWAF<sup>7</sup>IGV<sup>8</sup>DEA<sup>9</sup>HRL<sup>10</sup>KN<sup>11</sup>DSLL<sup>12</sup>YK<sup>13</sup>TLID<sup>14</sup>FKSN<sup>15</sup>HRL<sup>16</sup>LIT<sup>17</sup>GPL<sup>18</sup>QNS<sup>19</sup>LKEL<sup>20</sup>WS<sup>21</sup>LLHF<sup>22</sup>IMPE<sup>23</sup>  
Ptro\_CHD1 FNILL<sup>1</sup>TTYE<sup>2</sup>ILL<sup>3</sup>KDKA<sup>4</sup>FL<sup>5</sup>GGL<sup>6</sup>NWAF<sup>7</sup>IGV<sup>8</sup>DEA<sup>9</sup>HRL<sup>10</sup>KN<sup>11</sup>DSLL<sup>12</sup>YK<sup>13</sup>TLID<sup>14</sup>FKSN<sup>15</sup>HRL<sup>16</sup>LIT<sup>17</sup>GPL<sup>18</sup>QNS<sup>19</sup>LKEL<sup>20</sup>WS<sup>21</sup>LLHF<sup>22</sup>IMPE<sup>23</sup>  
Mmul\_CHD1 FNILL<sup>1</sup>TTYE<sup>2</sup>ILL<sup>3</sup>KDKA<sup>4</sup>FL<sup>5</sup>GGL<sup>6</sup>NWAF<sup>7</sup>IGV<sup>8</sup>DEA<sup>9</sup>HRL<sup>10</sup>KN<sup>11</sup>DSLL<sup>12</sup>YK<sup>13</sup>TLID<sup>14</sup>FKSN<sup>15</sup>HRL<sup>16</sup>LIT<sup>17</sup>GPL<sup>18</sup>QNS<sup>19</sup>LKEL<sup>20</sup>WS<sup>21</sup>LLHF<sup>22</sup>IMPE<sup>23</sup>  
Fcat\_CHD1 FNILL<sup>1</sup>TTYE<sup>2</sup>ILL<sup>3</sup>KDKA<sup>4</sup>FL<sup>5</sup>GGL<sup>6</sup>NWAF<sup>7</sup>IGV<sup>8</sup>DEA<sup>9</sup>HRL<sup>10</sup>KN<sup>11</sup>DSLL<sup>12</sup>YK<sup>13</sup>TLID<sup>14</sup>FKSN<sup>15</sup>HRL<sup>16</sup>LIT<sup>17</sup>GPL<sup>18</sup>QNS<sup>19</sup>LKEL<sup>20</sup>WS<sup>21</sup>LLHF<sup>22</sup>IMPE<sup>23</sup>  
Rnor\_CHD1 FNILL<sup>1</sup>TTYE<sup>2</sup>ILL<sup>3</sup>KDKA<sup>4</sup>FL<sup>5</sup>GGL<sup>6</sup>NWAF<sup>7</sup>IGV<sup>8</sup>DEA<sup>9</sup>HRL<sup>10</sup>KN<sup>11</sup>DSLL<sup>12</sup>YK<sup>13</sup>TLID<sup>14</sup>FKSN<sup>15</sup>HRL<sup>16</sup>LIT<sup>17</sup>GPL<sup>18</sup>QNS<sup>19</sup>LKEL<sup>20</sup>WS<sup>21</sup>LLHF<sup>22</sup>IMPE<sup>23</sup>  
Mmus\_CHD1 FNILL<sup>1</sup>TTYE<sup>2</sup>ILL<sup>3</sup>KDKA<sup>4</sup>FL<sup>5</sup>GGL<sup>6</sup>NWAF<sup>7</sup>IGV<sup>8</sup>DEA<sup>9</sup>HRL<sup>10</sup>KN<sup>11</sup>DSLL<sup>12</sup>YK<sup>13</sup>TLID<sup>14</sup>FKSN<sup>15</sup>HRL<sup>16</sup>LIT<sup>17</sup>GPL<sup>18</sup>QNS<sup>19</sup>LKEL<sup>20</sup>WS<sup>21</sup>LLHF<sup>22</sup>IMPE<sup>23</sup>

### Helicase C-Terminal (CHD1)

Hsap\_CHD1 LLDK<sup>1</sup>LLIR<sup>2</sup>LRERGN<sup>3</sup>RVLI<sup>4</sup>FSQ<sup>5</sup>MVR<sup>6</sup>MLD<sup>7</sup>ILAEYL<sup>8</sup>KYR<sup>9</sup>QFP<sup>10</sup>QRLD<sup>11</sup>GSIG<sup>12</sup>GEL<sup>13</sup>RK<sup>14</sup>QAL<sup>15</sup>DHF<sup>16</sup>NA<sup>17</sup>EG<sup>18</sup>SEDF<sup>19</sup>CF<sup>20</sup>LL<sup>21</sup>STRAG<sup>22</sup>GL<sup>23</sup>GIN<sup>24</sup>LASAD<sup>25</sup>TV<sup>26</sup>VI<sup>27</sup>FDS<sup>28</sup>  
Ptro\_CHD1 LLDK<sup>1</sup>LLIR<sup>2</sup>LRERGN<sup>3</sup>RVLI<sup>4</sup>FSQ<sup>5</sup>MVR<sup>6</sup>MLD<sup>7</sup>ILAEYL<sup>8</sup>KYR<sup>9</sup>QFP<sup>10</sup>QRLD<sup>11</sup>GSIG<sup>12</sup>GEL<sup>13</sup>RK<sup>14</sup>QAL<sup>15</sup>DHF<sup>16</sup>NA<sup>17</sup>EG<sup>18</sup>SEDF<sup>19</sup>CF<sup>20</sup>LL<sup>21</sup>STRAG<sup>22</sup>GL<sup>23</sup>GIN<sup>24</sup>LASAD<sup>25</sup>TV<sup>26</sup>VI<sup>27</sup>FDS<sup>28</sup>  
Mmul\_CHD1 LLDK<sup>1</sup>LLIR<sup>2</sup>LRERGN<sup>3</sup>RVLI<sup>4</sup>FSQ<sup>5</sup>MVR<sup>6</sup>MLD<sup>7</sup>ILAEYL<sup>8</sup>KYR<sup>9</sup>QFP<sup>10</sup>QRLD<sup>11</sup>GSIG<sup>12</sup>GEL<sup>13</sup>RK<sup>14</sup>QAL<sup>15</sup>DHF<sup>16</sup>NA<sup>17</sup>EG<sup>18</sup>SEDF<sup>19</sup>CF<sup>20</sup>LL<sup>21</sup>STRAG<sup>22</sup>GL<sup>23</sup>GIN<sup>24</sup>LASAD<sup>25</sup>TV<sup>26</sup>VI<sup>27</sup>FDS<sup>28</sup>  
Fcat\_CHD1 LLDK<sup>1</sup>LLIR<sup>2</sup>LRERGN<sup>3</sup>RVLI<sup>4</sup>FSQ<sup>5</sup>MVR<sup>6</sup>MLD<sup>7</sup>ILAEYL<sup>8</sup>KYR<sup>9</sup>QFP<sup>10</sup>QRLD<sup>11</sup>GSIG<sup>12</sup>GEL<sup>13</sup>RK<sup>14</sup>QAL<sup>15</sup>DHF<sup>16</sup>NA<sup>17</sup>EG<sup>18</sup>SEDF<sup>19</sup>CF<sup>20</sup>LL<sup>21</sup>STRAG<sup>22</sup>GL<sup>23</sup>GIN<sup>24</sup>LASAD<sup>25</sup>TV<sup>26</sup>VI<sup>27</sup>FDS<sup>28</sup>  
Rnor\_CHD1 LLDK<sup>1</sup>LLIR<sup>2</sup>LRERGN<sup>3</sup>RVLI<sup>4</sup>FSQ<sup>5</sup>MVR<sup>6</sup>MLD<sup>7</sup>ILAEYL<sup>8</sup>KYR<sup>9</sup>QFP<sup>10</sup>QRLD<sup>11</sup>GSIG<sup>12</sup>GEL<sup>13</sup>RR<sup>14</sup>QAL<sup>15</sup>DHF<sup>16</sup>NA<sup>17</sup>EG<sup>18</sup>SEDF<sup>19</sup>CF<sup>20</sup>LL<sup>21</sup>STRAG<sup>22</sup>GL<sup>23</sup>GIN<sup>24</sup>LASAD<sup>25</sup>TV<sup>26</sup>VI<sup>27</sup>FDS<sup>28</sup>  
Mmus\_CHD1 LLDK<sup>1</sup>LLIR<sup>2</sup>LRERGN<sup>3</sup>RVLI<sup>4</sup>FSQ<sup>5</sup>MVR<sup>6</sup>MLD<sup>7</sup>ILAEYL<sup>8</sup>KYR<sup>9</sup>QFP<sup>10</sup>QRLD<sup>11</sup>GSIG<sup>12</sup>GEL<sup>13</sup>RK<sup>14</sup>QAL<sup>15</sup>DHF<sup>16</sup>NA<sup>17</sup>EG<sup>18</sup>SEDF<sup>19</sup>CF<sup>20</sup>LL<sup>21</sup>STRAG<sup>22</sup>GL<sup>23</sup>GIN<sup>24</sup>LASAD<sup>25</sup>TV<sup>26</sup>VI<sup>27</sup>FDS<sup>28</sup>

Hsap\_CHD1 DWNP<sup>1</sup>QNDL<sup>2</sup>QAQARA<sup>3</sup>HRI<sup>4</sup>GQK<sup>5</sup>KQV<sup>6</sup>NIY<sup>7</sup>RLV<sup>8</sup>TK<sup>9</sup>GS<sup>10</sup>VEED<sup>11</sup>ILERAK<sup>12</sup>KM<sup>13</sup>VL<sup>14</sup>DHL<sup>15</sup>VI<sup>16</sup>QRMD<sup>17</sup>TT<sup>18</sup>  
Ptro\_CHD1 DWNP<sup>1</sup>QNDL<sup>2</sup>QAQARA<sup>3</sup>HRI<sup>4</sup>GQK<sup>5</sup>KQV<sup>6</sup>NIY<sup>7</sup>RLV<sup>8</sup>TK<sup>9</sup>GS<sup>10</sup>VEED<sup>11</sup>ILERAK<sup>12</sup>KM<sup>13</sup>VL<sup>14</sup>DHL<sup>15</sup>VI<sup>16</sup>QRMD<sup>17</sup>TT<sup>18</sup>  
Mmul\_CHD1 DWNP<sup>1</sup>QNDL<sup>2</sup>QAQARA<sup>3</sup>HRI<sup>4</sup>GQK<sup>5</sup>KQV<sup>6</sup>NIY<sup>7</sup>RLV<sup>8</sup>TK<sup>9</sup>GS<sup>10</sup>VEED<sup>11</sup>ILERAK<sup>12</sup>KM<sup>13</sup>VL<sup>14</sup>DHL<sup>15</sup>VI<sup>16</sup>QRMD<sup>17</sup>TT<sup>18</sup>  
Fcat\_CHD1 DWNP<sup>1</sup>QNDL<sup>2</sup>QAQARA<sup>3</sup>HRI<sup>4</sup>GQK<sup>5</sup>KQV<sup>6</sup>NIY<sup>7</sup>RLV<sup>8</sup>TK<sup>9</sup>GS<sup>10</sup>VEED<sup>11</sup>ILERAK<sup>12</sup>KM<sup>13</sup>VL<sup>14</sup>DHL<sup>15</sup>VI<sup>16</sup>QRMD<sup>17</sup>TT<sup>18</sup>  
Rnor\_CHD1 DWNP<sup>1</sup>QNDL<sup>2</sup>QAQARA<sup>3</sup>HRI<sup>4</sup>GQK<sup>5</sup>KQV<sup>6</sup>NIY<sup>7</sup>RLV<sup>8</sup>TK<sup>9</sup>GS<sup>10</sup>VEED<sup>11</sup>ILERAK<sup>12</sup>KM<sup>13</sup>VL<sup>14</sup>DHL<sup>15</sup>VI<sup>16</sup>QRMD<sup>17</sup>TT<sup>18</sup>  
Mmus\_CHD1 DWNP<sup>1</sup>QNDL<sup>2</sup>QAQARA<sup>3</sup>HRI<sup>4</sup>GQK<sup>5</sup>KQV<sup>6</sup>NIY<sup>7</sup>RLV<sup>8</sup>TK<sup>9</sup>GS<sup>10</sup>VEED<sup>11</sup>ILERAK<sup>12</sup>KM<sup>13</sup>VL<sup>14</sup>DHL<sup>15</sup>VI<sup>16</sup>QRMD<sup>17</sup>TT<sup>18</sup>

### SANT (CHD1)

CHD1\_Hsap KGFSDAE<sup>1</sup>IRRF<sup>2</sup>IKSY<sup>3</sup>KFG<sup>4</sup>GPLER<sup>5</sup>LD<sup>6</sup>AIARDAE<sup>7</sup>LV<sup>8</sup>DKSET<sup>9</sup>DL<sup>10</sup>RRL<sup>11</sup>GEL<sup>12</sup>VH<sup>13</sup>NGC<sup>14</sup>IKAL<sup>15</sup>KS<sup>16</sup>SGTERT<sup>17</sup>GG<sup>18</sup>RLG<sup>19</sup>KV<sup>20</sup>KGPT<sup>21</sup>FRIS<sup>22</sup>GV<sup>23</sup>QVN<sup>24</sup>  
CHD1\_Ptro KGFSDAE<sup>1</sup>IRRF<sup>2</sup>IKSY<sup>3</sup>KFG<sup>4</sup>GPLER<sup>5</sup>LD<sup>6</sup>AIARDAE<sup>7</sup>LV<sup>8</sup>DKSET<sup>9</sup>DL<sup>10</sup>RRL<sup>11</sup>GEL<sup>12</sup>VH<sup>13</sup>NGC<sup>14</sup>IKAL<sup>15</sup>KS<sup>16</sup>SGTERT<sup>17</sup>GG<sup>18</sup>RLG<sup>19</sup>KV<sup>20</sup>KGPT<sup>21</sup>FRIS<sup>22</sup>GV<sup>23</sup>QVN<sup>24</sup>  
CHD1\_Mmul KGFSDAE<sup>1</sup>IRRF<sup>2</sup>IKSY<sup>3</sup>KFG<sup>4</sup>GPLER<sup>5</sup>LD<sup>6</sup>AIARDAE<sup>7</sup>LV<sup>8</sup>DKSET<sup>9</sup>DL<sup>10</sup>RRL<sup>11</sup>GEL<sup>12</sup>VH<sup>13</sup>NGC<sup>14</sup>IKAL<sup>15</sup>KS<sup>16</sup>SGTERT<sup>17</sup>GG<sup>18</sup>RLG<sup>19</sup>KV<sup>20</sup>KGPT<sup>21</sup>FRIS<sup>22</sup>GV<sup>23</sup>QVN<sup>24</sup>  
CHD1\_Fcat KGFSDAE<sup>1</sup>IRRF<sup>2</sup>IKSY<sup>3</sup>KFG<sup>4</sup>GPLER<sup>5</sup>LD<sup>6</sup>AIARDAE<sup>7</sup>LV<sup>8</sup>DKSET<sup>9</sup>DL<sup>10</sup>RRL<sup>11</sup>GEL<sup>12</sup>VH<sup>13</sup>NGC<sup>14</sup>IKAL<sup>15</sup>KN<sup>16</sup>SSGTERT<sup>17</sup>GG<sup>18</sup>RLG<sup>19</sup>KV<sup>20</sup>KGPT<sup>21</sup>FRIS<sup>22</sup>GV<sup>23</sup>QVN<sup>24</sup>  
CHD1\_Rnor KGFSDAE<sup>1</sup>IRRF<sup>2</sup>IKSY<sup>3</sup>KFG<sup>4</sup>GPLER<sup>5</sup>LD<sup>6</sup>AIARDAE<sup>7</sup>LV<sup>8</sup>DKSET<sup>9</sup>DL<sup>10</sup>RRL<sup>11</sup>GEL<sup>12</sup>VH<sup>13</sup>NGC<sup>14</sup>V<sup>15</sup>KAL<sup>16</sup>KS<sup>17</sup>SGTERAG<sup>18</sup>RLG<sup>19</sup>KV<sup>20</sup>KGPT<sup>21</sup>FRIS<sup>22</sup>GV<sup>23</sup>QVN<sup>24</sup>  
CHD1\_Mmus KGFSDAE<sup>1</sup>IRRF<sup>2</sup>IKSY<sup>3</sup>KFG<sup>4</sup>GPLER<sup>5</sup>LD<sup>6</sup>AIARDAE<sup>7</sup>LV<sup>8</sup>DKSET<sup>9</sup>DL<sup>10</sup>RRL<sup>11</sup>GEL<sup>12</sup>VH<sup>13</sup>NGC<sup>14</sup>V<sup>15</sup>KAL<sup>16</sup>KS<sup>17</sup>SGTERAG<sup>18</sup>RLG<sup>19</sup>KV<sup>20</sup>KGPT<sup>21</sup>FRIS<sup>22</sup>GV<sup>23</sup>QVN<sup>24</sup>

### DUF4208 (CHD1)

CHD1\_Hsap LDQK<sup>1</sup>TF<sup>2</sup>SICKERM<sup>3</sup>RPV<sup>4</sup>KAAL<sup>5</sup>Q<sup>6</sup>LD<sup>7</sup>RP<sup>8</sup>EK<sup>9</sup>GL<sup>10</sup>SERE<sup>11</sup>Q<sup>12</sup>LEH<sup>13</sup>TRQ<sup>14</sup>CLIK<sup>15</sup>IGD<sup>16</sup>HITE<sup>17</sup>CL<sup>18</sup>KEY<sup>19</sup>TN<sup>20</sup>PE<sup>21</sup>QIK<sup>22</sup>QWR<sup>23</sup>KNL<sup>24</sup>WIF<sup>25</sup>VSK<sup>26</sup>FT<sup>27</sup>ED<sup>28</sup>ARK<sup>29</sup>LH<sup>30</sup>KL<sup>31</sup>YK<sup>32</sup>  
CHD1\_Ptro LDQK<sup>1</sup>TF<sup>2</sup>SICKERM<sup>3</sup>RPV<sup>4</sup>KAAL<sup>5</sup>Q<sup>6</sup>LD<sup>7</sup>RP<sup>8</sup>EK<sup>9</sup>GL<sup>10</sup>SERE<sup>11</sup>Q<sup>12</sup>LEH<sup>13</sup>TRQ<sup>14</sup>CLIK<sup>15</sup>IGD<sup>16</sup>HITE<sup>17</sup>CL<sup>18</sup>KEY<sup>19</sup>TN<sup>20</sup>PE<sup>21</sup>QIK<sup>22</sup>QWR<sup>23</sup>KNL<sup>24</sup>WIF<sup>25</sup>VSK<sup>26</sup>FT<sup>27</sup>ED<sup>28</sup>ARK<sup>29</sup>LH<sup>30</sup>KL<sup>31</sup>YK<sup>32</sup>  
CHD1\_Mmul LDQK<sup>1</sup>TF<sup>2</sup>SICKERM<sup>3</sup>RPV<sup>4</sup>KAAL<sup>5</sup>Q<sup>6</sup>LD<sup>7</sup>RP<sup>8</sup>EK<sup>9</sup>GL<sup>10</sup>SERE<sup>11</sup>Q<sup>12</sup>LEH<sup>13</sup>TRQ<sup>14</sup>CLIK<sup>15</sup>IGD<sup>16</sup>HITE<sup>17</sup>CL<sup>18</sup>KEY<sup>19</sup>TN<sup>20</sup>PE<sup>21</sup>QIK<sup>22</sup>QWR<sup>23</sup>KNL<sup>24</sup>WIF<sup>25</sup>VSK<sup>26</sup>FT<sup>27</sup>ED<sup>28</sup>ARK<sup>29</sup>LH<sup>30</sup>KL<sup>31</sup>YK<sup>32</sup>  
CHD1\_Fcat LDQK<sup>1</sup>TF<sup>2</sup>SICKERM<sup>3</sup>RPV<sup>4</sup>KAAL<sup>5</sup>Q<sup>6</sup>LD<sup>7</sup>RP<sup>8</sup>EK<sup>9</sup>GL<sup>10</sup>SERE<sup>11</sup>Q<sup>12</sup>LEH<sup>13</sup>TRQ<sup>14</sup>CLIK<sup>15</sup>IGD<sup>16</sup>HITE<sup>17</sup>CL<sup>18</sup>KEY<sup>19</sup>TN<sup>20</sup>PE<sup>21</sup>QIK<sup>22</sup>QWR<sup>23</sup>KNL<sup>24</sup>WIF<sup>25</sup>VSK<sup>26</sup>FT<sup>27</sup>ED<sup>28</sup>ARK<sup>29</sup>LH<sup>30</sup>KL<sup>31</sup>YK<sup>32</sup>  
CHD1\_Rnor LDQK<sup>1</sup>TF<sup>2</sup>SICKERM<sup>3</sup>RPV<sup>4</sup>KAAL<sup>5</sup>Q<sup>6</sup>LD<sup>7</sup>RP<sup>8</sup>EK<sup>9</sup>GL<sup>10</sup>SERE<sup>11</sup>Q<sup>12</sup>LEH<sup>13</sup>TRQ<sup>14</sup>CLIK<sup>15</sup>IGD<sup>16</sup>HITE<sup>17</sup>CL<sup>18</sup>KEY<sup>19</sup>TN<sup>20</sup>PE<sup>21</sup>QIK<sup>22</sup>QWR<sup>23</sup>KNL<sup>24</sup>WIF<sup>25</sup>VSK<sup>26</sup>FT<sup>27</sup>ED<sup>28</sup>ARK<sup>29</sup>LH<sup>30</sup>KL<sup>31</sup>YK<sup>32</sup>  
CHD1\_Mmus LDQK<sup>1</sup>TF<sup>2</sup>SICKERM<sup>3</sup>RPV<sup>4</sup>KAAL<sup>5</sup>Q<sup>6</sup>LD<sup>7</sup>RP<sup>8</sup>EK<sup>9</sup>GL<sup>10</sup>SERE<sup>11</sup>Q<sup>12</sup>LEH<sup>13</sup>TRQ<sup>14</sup>CLIK<sup>15</sup>IGD<sup>16</sup>HITE<sup>17</sup>CL<sup>18</sup>KEY<sup>19</sup>TN<sup>20</sup>PE<sup>21</sup>QIK<sup>22</sup>QWR<sup>23</sup>KNL<sup>24</sup>WIF<sup>25</sup>VSK<sup>26</sup>FT<sup>27</sup>ED<sup>28</sup>ARK<sup>29</sup>LH<sup>30</sup>KL<sup>31</sup>YK<sup>32</sup>

### Chromo 1 (CHD2)

Hsap\_CHD2 ETIEK<sup>1</sup>VLDS<sup>2</sup>RLG<sup>3</sup>KGKAT<sup>4</sup>GAST<sup>5</sup>TVYA<sup>6</sup>IEANG<sup>7</sup>DPS<sup>8</sup>GD<sup>9</sup>FDTE<sup>10</sup>KDEGE<sup>11</sup>IQYL<sup>12</sup>IKWK<sup>13</sup>GSY<sup>14</sup>IHS<sup>15</sup>TWE<sup>16</sup>SEE<sup>17</sup>SL<sup>18</sup>QQQ<sup>19</sup>KV<sup>20</sup>GL<sup>21</sup>KK<sup>22</sup>LEN<sup>23</sup>FKK<sup>24</sup>KEDE<sup>25</sup>IK<sup>26</sup>QWL<sup>27</sup>G<sup>28</sup>  
Ptro\_CHD2 ETIEK<sup>1</sup>VLDS<sup>2</sup>RLG<sup>3</sup>KGKAT<sup>4</sup>GAST<sup>5</sup>TVYA<sup>6</sup>IEANG<sup>7</sup>DPS<sup>8</sup>GD<sup>9</sup>FDTE<sup>10</sup>KDEGE<sup>11</sup>IQYL<sup>12</sup>IKWK<sup>13</sup>GSY<sup>14</sup>IHS<sup>15</sup>TWE<sup>16</sup>SEE<sup>17</sup>SL<sup>18</sup>QQQ<sup>19</sup>KV<sup>20</sup>GL<sup>21</sup>KK<sup>22</sup>LEN<sup>23</sup>FKK<sup>24</sup>KEDE<sup>25</sup>IK<sup>26</sup>QWL<sup>27</sup>G<sup>28</sup>  
Mmul\_CHD2 ETIEK<sup>1</sup>VLDS<sup>2</sup>RLG<sup>3</sup>KGKAT<sup>4</sup>GAST<sup>5</sup>TVYA<sup>6</sup>IEANG<sup>7</sup>DPS<sup>8</sup>GD<sup>9</sup>FDTE<sup>10</sup>KDEGE<sup>11</sup>IQYL<sup>12</sup>IKWK<sup>13</sup>GSY<sup>14</sup>IHS<sup>15</sup>TWE<sup>16</sup>SEE<sup>17</sup>SL<sup>18</sup>QQQ<sup>19</sup>KV<sup>20</sup>GL<sup>21</sup>KK<sup>22</sup>LEN<sup>23</sup>FKK<sup>24</sup>KEDE<sup>25</sup>IK<sup>26</sup>QWL<sup>27</sup>G<sup>28</sup>  
Fcat\_CHD2 ETIEK<sup>1</sup>VLDS<sup>2</sup>RLG<sup>3</sup>KGKAT<sup>4</sup>GAST<sup>5</sup>TVYA<sup>6</sup>IEANG<sup>7</sup>DPS<sup>8</sup>GD<sup>9</sup>FDTE<sup>10</sup>KDEGE<sup>11</sup>IQYL<sup>12</sup>IKWK<sup>13</</sup>

Rnor\_CHD2 AHSWCKNSVILADEMGLGKTIQTISFLSYLFHQHLYGPFLIVVPLSTLTSWQREFEIIWAPEINVVVYIGDLMsrNTIREYEWIHSQTKRLK  
Mmus\_CHD2 AHSWCKNSVILADEMGLGKTIQTISFLSYLFHQHLYGPFLIVVPLSTLTSWQREFEIIWAPEINVVVYIGDLMsrNTIREYEWIHSQTKRLK

Hsap\_CHD2 FNALITTYEILLKDKTVLGSINWAF LGVDEAHRLKNDDSLLYKTLIDFKSNHRLITGTPLQNSLKELWSLLHFIMPE  
Ptro\_CHD2 FNALITTYEILLKDKTVLGSINWAF LGVDEAHRLKNDDSLLYKTLIDFKSNHRLITGTPLQNSLKELWSLLHFIMPE  
Mmul\_CHD2 FNALITTYEILLKDKTVLGSINWAF LGVDEAHRLKNDDSLLYKTLIDFKSNHRLITGTPLQNSLKELWSLLHFIMPE  
Fcat\_CHD2 FNALITTYEILLKDKTVLGSINWAF LGVDEAHRLKNDDSLLYKTLIDFKSNHRLITGTPLQNSLKELWSLLHFIMPE  
Rnor\_CHD2 FNALITTYEILLKDKTVLGSINWAF LGVDEAHRLKNDDSLLYKTLIDFKSNHRLITGTPLQNSLKELWSLLHFIMPE  
Mmus\_CHD2 FNALITTYEILLKDKTVLGSINWAF LGVDEAHRLKNDDSLLYKTLIDFKSNHRLITGTPLQNSLKELWSLLHFIMPE

#### Helicase C-Terminal (CHD2)

Hsap\_CHD2 LLDKLLTRLRERGNRVLIFSQMVRMLDILA EYLTIKHYPFQRLDGSIKGEIRKQALDHFNADGSEDFCFLLSTRAGGLGINLASADTVVIFDS  
Ptro\_CHD2 LLDKLLTRLRERGNRVLIFSQMVRMLDILA EYLTIKHYPFQRLDGSIKGEIRKQALDHFNADGSEDFCFLLSTRAGGLGINLASADTVVIFDS  
Mmul\_CHD2 LLDKLLTRLRERGNRVLIFSQMVRMLDILA EYLTIKHYPFQRLDGSIKGEIRKQALDHFNADGSEDFCFLLSTRAGGLGINLASADTVVIFDS  
Fcat\_CHD2 LLDKLLTRLRERGNRVLIFSQMVRMLDILA EYLTIKHYPFQRLDGSIKGEIRKQALDHFNADGSEDFCFLLSTRAGGLGINLASADTVVIFDS  
Rnor\_CHD2 LLDKLLTRLRERGNRVLIFSQMVRMLDILA EYLTIKHYPFQRLDGSIKGEIRKQALDHFNADGSEDFCFLLSTRAGGLGINLASADTVVIFDS  
Mmus\_CHD2 LLDKLLTRLRERGNRVLIFSQMVRMLDILA EYLTIKHYPFQRLDGSIKGEIRKQALDHFNADGSEDFCFLLSTRAGGLGINLASADTVVIFDS

Hsap\_CHD2 DWNPNQNDLQAQARAHRI GQKKQVNIYRLVTKGTVEEEIIERAKKKMVL DHLVIQRMDTT  
Ptro\_CHD2 DWNPNQNDLQAQARAHRI GQKKQVNIYRLVTKGTVEEEIIERAKKKMVL DHLVIQRMDTT  
Mmul\_CHD2 DWNPNQNDLQAQARAHRI GQKKQVNIYRLVTKGTVEEEIIERAKKKMVL DHLVIQRMDTT  
Fcat\_CHD2 DWNPNQNDLQAQARAHRI GQKKQVNIYRLVTKGTVEEEIIERAKKKMVL DHLVIQRMDTT  
Rnor\_CHD2 DWNPNQNDLQAQARAHRI GQKKQVNIYRLVTKGTVEEEIIERAKKKMVL DHLVIQRMDTT  
Mmus\_CHD2 DWNPNQNDLQAQARAHRI GQKKQVNIYRLVTKGTVEEEIIERAKKKMVL DHLVIQRMDTT

#### SANT (CHD2)

CHD2\_Hsap GFTDAEIRRFIKAYKKFGLPLERLECIARDAELVDKSVADLKR LGELIHNscvsAMQeYEEQLKENASEGKGPgKRRGPTIKISGVQVN  
CHD2\_Ptro GFTDAEIRRFIKAYKKFGLPLERLECIARDAELVDKSVADLKR LGELIHNscvsAMQeYEEQLKENASEGKGPgKRRGPTIKISGVQVN  
CHD2\_Mmul GFTDAEIRRFIKAYKKFGLPLERLECIARDAELVDKSVADLKR LGELIHNscvsAMQeYEEQLKENASEGKGPgKRRGPTIKISGVQVN  
CHD2\_Fcat GFTDAEIRRFIKAYKKFGLPLERLECIARDAELVDKSVADLKR LGELIHNscvsAMQeYEEQLKENASEGKGPgKRRGPTIKISGVQVN  
CHD2\_Rnor GFTDAEIRRFIKAYKKFGLPLERLECIARDAELVDKSVADLKR LGELIHNscvsAMQeYEEQLKENASEGKGPgKRRGPTIKISGVQVN  
CHD2\_Mmus GFTDAEIRRFIKAYKKFGLPLERLECIARDAELVDKSVADLKR LGELIHNscvsAMQeYEEQLKEStSEGKGPgKRRGPTIKISGVQVN

#### DUF4208 (CHD2)

CHD2\_Hsap ICKERM RPVKKALKQLDKPKGLNVQEQL EHTRNCLLKIGDRIAECLKAYS DQEHIKLWRRNLWIFVSKFTEFDARKLHKLYK  
CHD2\_Ptro ICKERM RPVKKALKQLDKPKGLNVQEQL EHTRNCLLKIGDRIAECLKAYS DQEHIKLWRRNLWIFVSKFTEFDARKLHKLYK  
CHD2\_Mmul ICKERM RPVKKALKQLDKPKGLNVQEQL EHTRNCLLKIGDRIAECLKAYS DQEHIKLWRRNLWIFVSKFTEFDARKLHKLYK  
CHD2\_Fcat ICKERM RPVKKALKQLDKPKGLNVQEQL EHTRNCLLKIGDRIAECLKAYS DQEHIKLWRRNLWIFVSKFTEFDARKLHKLYK  
CHD2\_Rnor ICKERM RPVKKALKQLDKPKGLNVQEQL EHTRNCLLKIGDRIAECLKAYS DQEHIKLWRRNLWIFVSKFTEFDARKLHKLYK  
CHD2\_Mmus ICKERM RPVKKALKQLDKPKGLSVQEQL EHTRNCLLKIGDRIAECLKAYS DQEHIKLWRRNLWIFVSKFTEFDARKLHKLYK

## GROUP II

#### PHD I (CHD3)

Hsap\_CHD3 QDYCEVCQQGGEIILCDTCP RAYHLVCLDPELDRAPEGK WSCPHCEKE  
Ptro\_CHD3 QDYCEVCQQGGEIILCDTCP RAYHLVCLDPELDRAPEGK WSCPHCEKE  
Mmul\_CHD3 QDYCEVCQQGGEIILCDTCP RAYHLVCLDPELDRAPEGK WSCPHCEKE  
Fcat\_CHD3 QDYCEVCQQGGEIILCDTCP RAYHLVCLDPELDRAPEGK WSCPHCEKE  
Rnor\_CHD3 QDYCEVCQQGGEIILCDTCP RAYHLVCLDPELDRAPEGK WSCPHCEKE  
Mmus\_CHD3 QDYCEVCQQGGEIILCDTCP RAYHLVCLDPELDRAPEGK WSCPHCEKE

#### PHD II (CHD3)

Hsap\_CHD3 MEYCRVCKDGGELLCCDACISSYH IHClnPPLDIPNGEWLCP RCTCP  
Ptro\_CHD3 MEYCRVCKDGGELLCCDACISSYH IHClnPPLDIPNGEWLCP RCTCP  
Mmul\_CHD3 MEYCRVCKDGGELLCCDACISSYH IHClnPPLDIPNGEWLCP RCTCP  
Fcat\_CHD3 MEYCRVCKDGGELLCCDACISSYH IHClnPPLDIPNGEWLCP RCTCP  
Rnor\_CHD3 MEYCRVCKDGGELLCCDACISSYH IHClnPPLDIPNGEWLCP RCTCP  
Mmus\_CHD3 MEYCRVCKDGGELLCCDACISSYH IHClnPPLDIPNGEWLCP RCTCP

#### Chromo 1 (CHD3)

Hsap\_CHD3 EWLCP RCTCPVLKGRVQKILHWRWGEP PVAVPAPQQADGNPDVPPRP LQGRSEREFFVKWVGLSYWHCSWAKELQLEIFHLVMYRNYQRKNDMDEPPPLD  
Ptro\_CHD3 EWLCP RCTCPVLKGRVQKILHWRWGEP PVAVPAPQQADGNPDVPPRP LQGRSEREFFVKWVGLSYWHCSWAKELQLEIFHLVMYRNYQRKNDMDEPPPLD  
Mmul\_CHD3 EWLCP RCTCPVLKGRVQKILHWRWGEP PVAVPAPQQADGNPDVPPRP LQGRSEREFFVKWVGLSYWHCSWAKELQLEIFHLVMYRNYQRKNDMDEPPPLD  
Fcat\_CHD3 EWLCP RCTCPVLKGRVQKILHWRWGEP PVAVPAPQQADGNPDVPPRP LQGRSEREFFVKWVGLSYWHCSWAKELQLEIFHLVMYRNYQRKNDMDEPPPLD  
Rnor\_CHD3 EWLCP RCTCPVLKGRVQKILHWRWGEP PVAVPAPQQADGNPDVPPRP LQGRSEREFFVKWVGLSYWHCSWAKELQLEIFHLVMYRNYQRKNDMDEPPPLD  
Mmus\_CHD3 EWLCP RCTCPVLKGRVQKILHWRWGEP PVAVPAPQQADGNPDVPPRP LQGRSEREFFVKWVGLSYWHCSWAKELQLEIFHLVMYRNYQRKNDMDEPPPLD

#### Chromo 2 (CHD3)

Hsap\_CHD3 MTVHRIINHSDKKGN YHYLVKWRDL PYDQSTWEEDEMN IPEY  
Ptro\_CHD3 MTVHRIINHSDKKGN YHYLVKWRDL PYDQSTWEEDEMN IPEY  
Mmul\_CHD3 MTVHRIINHSDKKGN YHYLVKWRDL PYDQSTWEEDEMN IPEY  
Fcat\_CHD3 MTVHRIINHSDKKGS YHYLVKWRDL PYDQSTWEEDEMS IPEY  
Rnor\_CHD3 MTVHRIINHSDMKKGN YHYLVKWRDL PYDQSTWEEDEMN IPEY  
Mmus\_CHD3 MTVHRIINHSDMKKGN YHYLVKWRDL PYDQSTWEEDEMN IPEY

#### Helicase ATP-Binding (CHD3)

Hsap\_CHD3 RFSWAQGTDTILADEMGLGKTIQTIVFLYSLYKEGHTKG PFLVSAPLSTIINWEREFQM WAPKFYVVITYTGDKDSRAIIRENEFSFEDNAIKGGKKAF  
Ptro\_CHD3 RFSWAQGTDTILADEMGLGKTIQTIVFLYSLYKEGHTKG PFLVSAPLSTIINWEREFQM WAPKFYVVITYTGDKDSRAIIRENEFSFEDNAIKGGKKAF  
Mmul\_CHD3 RFSWAQGTDTILADEMGLGKTIQTIVFLYSLYKEGHTKG PFLVSAPLSTIINWEREFQM WAPKFYVVITYTGDKDSRAIIRENEFSFEDNAIKGGKKAF  
Fcat\_CHD3 RFSWAQGTDTILADEMGLGKTIQTIVFLYSLYKEGHTKG PFLVSAPLSTIINWEREFQM WAPKFYVVITYTGDKDSRAIIRENEFSFEDNAIKGGKKAF  
Rnor\_CHD3 RFSWAQGTDTILADEMGLGKTIQTIVFLYSLYKEGHTKG PFLVSAPLSTIINWEREFQM WAPKFYVVITYTGDKDSRAIIRENEFSFEDNAIKGGKKAF

Mmus\_CHD3 RFSWAQGTDTILADEMGLGKTIQTIVFLYSLYKEGHTKGPFLVSAPLSTIINWEREFQMWAPKFYVVTYTGDKDSRAIIRENEFSFEDNAIKGGKKAF

Hsap\_CHD3 KMKREAOVKFHVLLTSYELITIDQAALGSIRWACLVDDEAHLKNNQSKFFRVLNGYKIDHKLLLTGTPLQNNLEELFHLNFLTPE  
Ptro\_CHD3 KMKREAOVKFHVLLTSYELITIDQAALGSIRWACLVDDEAHLKNNQSKFFRVLNGYKIDHKLLLTGTPLQNNLEELFHLNFLTPE  
Mmu1\_CHD3 KMKREAOVKFHVLLTSYELITIDQAALGSIRWACLVDDEAHLKNNQSKFFRVLNGYKIDHKLLLTGTPLQNNLEELFHLNFLTPE  
Fcat\_CHD3 KMKREAOVKFHVLLTSYELITIDQAALGSIRWACLVDDEAHLKNNQSKFFRVLNGYKIDHKLLLTGTPLQNNLEELFHLNFLTPE  
Rnor\_CHD3 KMKREAOVKFHVLLTSYELITIDQAALGSIRWACLVDDEAHLKNNQSKFFRVLNGYKIDHKLLLTGTPLQNNLEELFHLNFLTPE  
Mmus\_CHD3 KMKREAOVKFHVLLTSYELITIDQAALGSIRWACLVDDEAHLKNNQSKFFRVLNGYKIDHKLLLTGTPLQNNLEELFHLNFLTPE

**Helicase C-Terminal (CHD3)**

Hsap\_CHD3 LLQKMLRKLKEQGHVLIIFSQMTKMLDLLDFLDYEGYKYERIDGGITGALRQEAIIDRFNAPGAQQFCFLLSTRAGGLGINLATADTVIIFDSWNPH  
Ptro\_CHD3 LLQKMLRKLKEQGHVLIIFSQMTKMLDLLDFLDYEGYKYERIDGGITGALRQEAIIDRFNAPGAQQFCFLLSTRAGGLGINLATADTVIIFDSWNPH  
Mmu1\_CHD3 LLQKMLRKLKEQGHVLIIFSQMTKMLDLLDFLDYEGYKYERIDGGITGALRQEAIIDRFNAPGAQQFCFLLSTRAGGLGINLATADTVIIFDSWNPH  
Fcat\_CHD3 LLQKMLRKLKEQGHVLIIFSQMTKMLDLLDFLDYEGYKYERIDGGITGALRQEAIIDRFNAPGAQQFCFLLSTRAGGLGINLATADTVIIFDSWNPH  
Rnor\_CHD3 LLQKMLRKLKEQGHVLIIFSQMTKMLDLLDFLDYEGYKYERIDGGITGALRQEAIIDRFNAPGAQQFCFLLSTRAGGLGINLATADTVIIFDSWNPH  
Mmus\_CHD3 LLQKMLRKLKEQGHVLIIFSQMTKMLDLLDFLDYEGYKYERIDGGITGALRQEAIIDRFNAPGAQQFCFLLSTRAGGLGINLATADTVIIFDSWNPH

Hsap\_CHD3 NDIQAFSRAHRIGQANKVMIYRFVTRASVEERITQVAKRKMLTHLVVRPGLGSKAGSMKQELDDIL  
Ptro\_CHD3 NDIQAFSRAHRIGQANKVMIYRFVTRASVEERITQVAKRKMLTHLVVRPGLGSKAGSMKQELDDIL  
Mmu1\_CHD3 NDIQAFSRAHRIGQANKVMIYRFVTRASVEERITQVAKRKMLTHLVVRPGLGSKAGSMKQELDDIL  
Fcat\_CHD3 NDIQAFSRAHRIGQANKVMIYRFVTRASVEERITQVAKRKMLTHLVVRPGLGSKAGSMKQELDDIL  
Rnor\_CHD3 NDIQAFSRAHRIGQANKVMIYRFVTRASVEERITQVAKRKMLTHLVVRPGLGSKAGSMKQELDDIL  
Mmus\_CHD3 NDIQAFSRAHRIGQANKVMIYRFVTRASVEERITQVAKRKMLTHLVVRPGLGSKAGSMKQELDDIL

**DUF1087 (CHD3)**

CHD3\_Hsap NVDPDYWEKLLRHHYEQQEDLARNLGKGRVRKQVNYNDAAQE  
CHD3\_Ptro NVDPDYWEKLLRHHYEQQEDLARNLGKGRVRKQVNYNDAAQE  
CHD3\_Mmu1 NVDPDYWEKLLRHHYEQQEDLARNLGKGRVRKQVNYNDAAQE  
CHD3\_Fcat NVDPDYWEKLLRHHYEQQEDLARNLGKGRVRKQVNYNDAAQE  
CHD3\_Rnor NVDPDYWEKLLRHHYEQQEDLARNLGKGRVRKQVNYNDAAQE  
CHD3\_Mmus NVDPDYWEKLLRHHYEQQEDLARNLGKGRVRKQVNYNDAAQE

**DUF1086 (CHD3)**

CHD3\_Hsap PEGRRQSKRQLRNEKDPLPPLLARVGGNIEVLGFNTRQRKAFLNAMVRWGMPPQDAFTTQWLVRDLRGKTEKEFKAYVSLFMRHLCPEGADGSETFADG  
CHD3\_Ptro PEGRRQSKRQLRNEKDPLPPLLARVGGNIEVLGFNTRQRKAFLNAMVRWGMPPQDAFTTQWLVRDLRGKTEKEFKAYVSLFMRHLCPEGADGSETFADG  
CHD3\_Mmu1 PEGRRQSKRQLRNEKDPLPPLLARVGGNIEVLGFNTRQRKAFLNAMVRWGMPPQDAFTTQWLVRDLRGKTEKEFKAYVSLFMRHLCPEGADGSETFADG  
CHD3\_Fcat PEGRRQSKRQLRNEKDPLPPLLARVGGNIEVLGFNTRQRKAFLNAMVRWGMPPQDAFTTQWLVRDLRGKTEKEFKAYVSLFMRHLCPEGADGSETFADG  
CHD3\_Rnor PEGRRQSKRQLRNEKDPLPPLLARVGGNIEVLGFNTRQRKAFLNAMVRWGMPPQDAFTTQWLVRDLRGKTEKEFKAYVSLFMRHLCPEGADGSETFADG  
CHD3\_Mmus PEGRRQSKRQLRNEKDPLPPLLARVGGNIEVLGFNTRQRKAFLNAMVRWGMPPQDAFTTQWLVRDLRGKTEKEFKAYVSLFMRHLCPEGADGSETFADG

CHD3\_Hsap VPREGLSRQQVLTRIGVMSLVKKKVQEFEHINGRWSMPEL  
CHD3\_Ptro VPREGLSRQQVLTRIGVMSLVKKKVQEFEHINGRWSMPEL  
CHD3\_Mmu1 VPREGLSRQQVLTRIGVMSLVKKKVQEFEHINGRWSMPEL  
CHD3\_Fcat VPREGLSRQQVLTRIGVMSLVKKKVQEFEHINGRWSMPEL  
CHD3\_Rnor VPREGLSRQQVLTRIGVMSLVKKKVQEFEHINGRWSMPEL  
CHD3\_Mmus VPREGLSRQQVLTRIGVMSLVKKKVQEFEHINGRWSMPEL

**PHD I (CHD4)**

Hsap\_CHD4 QDYCEVCQQGGEIILCDTCPRAYHMCCLDPDMEKAPEGKWSCPHCEKE  
Ptro\_CHD4 QDYCEVCQQGGEIILCDTCPRAYHMCCLDPDMEKAPEGKWSCPHCEKE  
Mmu1\_CHD4 QDYCEVCQQGGEIILCDTCPRAYHMCCLDPDMEKAPEGKWSCPHCEKE  
Fcat\_CHD4 QDYCEVCQQGGEIILCDTCPRAYHMCCLDPDMEKAPEGKWSCPHCEKE  
Rnor\_CHD4 QDYCEVCQQGGEIILCDTCPRAYHMCCLDPDMEKAPEGKWSCPHCEKE  
Mmus\_CHD4 QDYCEVCQQGGEIILCDTCPRAYHMCCLDPDMEKAPEGKWSCPHCEKE

**PHD II (CHD4)**

Hsap\_CHD4 MEFCRVCKDGGELLCCDTCPSYYIHCLNPPLPEIPNGEWLCPRCTCP  
Ptro\_CHD4 MEFCRVCKDGGELLCCDTCPSYYIHCLNPPLPEIPNGEWLCPRCTCP  
Mmu1\_CHD4 MEFCRVCKDGGELLCCDTCPSYYIHCLNPPLPEIPNGEWLCPRCTCP  
Fcat\_CHD4 MEFCRVCKDGGELLCCDTCPSYYIHCLNPPLPEIPNGEWLCPRCTCP  
Rnor\_CHD4 MEFCRVCKDGGELLCCDTCPSYYIHCLNPPLPEIPNGEWLCPRCTCP  
Mmus\_CHD4 MEFCRVCKDGGELLCCDTCPSYYIHCLNPPLPEIPNGEWLCPRCTCP

**Chromo 1 (CHD4)**

Hsap\_CHD4 TCPALKGKVQKILIKWKGQPPSPTPVPRPPDADPNTSPKPLEGRPERQFFVKWQGMSYWHCSWVSELQLELHCQVMFRNYQRKNDMDEPPSGDFGGDEEK  
Ptro\_CHD4 TCPALKGKVQKILIKWKGQPPSPTPVPRPPDADPNTSPKPLEGRPERQFFVKWQGMSYWHCSWVSELQLELHCQVMFRNYQRKNDMDEPPSGDFGGDEEK  
Mmu1\_CHD4 TCPALKGKVQKILIKWKGQPPSPTPVPRPPDADPNTSPKPLEGRPERQFFVKWQGMSYWHCSWVSELQLELHCQVMFRNYQRKNDMDEPPSGDFGGDEEK  
Fcat\_CHD4 TCPALKGKVQKILIKWKGQPPSPTPVPRPPDADPNTSPKPLEGRPERQFFVKWQGMSYWHCSWVSELQLELHCQVMFRNYQRKNDMDEPPSGDFGGDEEK  
Rnor\_CHD4 TCPALKGKVQKILIKWKGQPPSPTPVPRPPDADPNTSPKPLEGRPERQFFVKWQGMSYWHCSWVSELQLELHCQVMFRNYQRKNDMDEPPSGDFGGDEEK  
Mmus\_CHD4 TCPALKGKVQKILIKWKGQPPSPTPVPRPPDADPNTSPKPLEGRPERQFFVKWQGMSYWHCSWVSELQLELHCQVMFRNYQRKNDMDEPPSGDFGGDEEK

**Chromo 2 (CHD4)**

Hsap\_CHD4 MMIHRILNHSVDKKGHVHYLIKWRDLPYDQASWESEDVEIQDYDLFKQSYWNHRELMRGEEGRP GKKLKKVKLRKL  
Ptro\_CHD4 MMIHRILNHSVDKKGHVHYLIKWRDLPYDQASWESEDVEIQDYDLFKQSYWNHRELMRGEEGRP GKKLKKVKLRKL  
Mmu1\_CHD4 MMIHRILNHSVDKKGHVHYLIKWRDLPYDQASWESEDVEIQDYDLFKQSYWNHRELMRGEEGRP GKKLKKVKLRKL  
Fcat\_CHD4 MMIHRILNHSVDKKGHVHYLIKWRDLPYDQASWESEDVEIQDYDLFKQSYWNHRELMRGEEGRP GKKLKKVKLRKL  
Rnor\_CHD4 MMIHRILNHSVDKKGHVHYLIKWRDLPYDQASWESEDVEIQDYDLFKQSYWNHRELMRGEEGRP GKKLKKVKLRKL  
Mmus\_CHD4 MMIHRILNHSVDKKGHVHYLIKWRDLPYDQASWESEDVEIQDYDLFKQSYWNHRELMRGEEGRP GKKLKKVKLRKL

**Helicase ATP-Binding (CHD4)**

Hsap\_CHD4 RFSWAQGTDTILADEMGLGKTVQTAVFLYSLYKEGHSKGPFLVSAPLSTIINWEREFEMWAPDMYVVTYVGDKDSRAIIRENEFSFEDNAIRGGKKASR  
Ptro\_CHD4 RFSWAQGTDTILADEMGLGKTVQTAVFLYSLYKEGHSKGPFLVSAPLSTIINWEREFEMWAPDMYVVTYVGDKDSRAIIRENEFSFEDNAIRGGKKASR  
Mmu1\_CHD4 RFSWAQGTDTILADEMGLGKTVQTAVFLYSLYKEGHSKGPFLVSAPLSTIINWEREFEMWAPDMYVVTYVGDKDSRAIIRENEFSFEDNAIRGGKKASR  
Fcat\_CHD4 RFSWAQGTDTILADEMGLGKTVQTAVFLYSLYKEGHSKGPFLVSAPLSTIINWEREFEMWAPDMYVVTYVGDKDSRAIIRENEFSFEDNAIRGGKKASR  
Rnor\_CHD4 RFSWAQGTDTILADEMGLGKTVQTAVFLYSLYKEGHSKGPFLVSAPLSTIINWEREFEMWAPDMYVVTYVGDKDSRAIIRENEFSFEDNAIRGGKKASR

Mmus\_CHD4 RFSWAQGTDT **ILADEMGLGKTVQ**TAVFLYSLYKEGHSKGPFL **VSAPLST**IINWEREFEMWAPDMYVVTYVGDKDSRAIIRENEFSFEDNAI **RGGKKASR**

Hsap\_CHD4 **MKKEASVKFHVLLTSYELITID**MAIL **GSIDWACLIVDEAHR**LKNNQSKFFRVNLGYSLQHK **LLLGTGPLQNNLE**ELFHLLNFLTPE  
Ptro\_CHD4 **MKKEASVKFHVLLTSYELITID**MAIL **GSIDWACLIVDEAHR**LKNNQSKFFRVNLGYSLQHK **LLLGTGPLQNNLE**ELFHLLNFLTPE  
Mmul\_CHD4 **MKKEASVKFHVLLTSYELITID**MAIL **GSIDWACLIVDEAHR**LKNNQSKFFRVNLGYSLQHK **LLLGTGPLQNNLE**ELFHLLNFLTPE  
Fcat\_CHD4 **MKKEASVKFHVLLTSYELITID**MAIL **GSIDWACLIVDEAHR**LKNNQSKFFRVNLGYSLQHK **LLLGTGPLQNNLE**ELFHLLNFLTPE  
Rnor\_CHD4 **MKKEASVKFHVLLTSYELITID**MAIL **GSIDWACLIVDEAHR**LKNNQSKFFRVNLGYSLQHK **LLLGTGPLQNNLE**ELFHLLNFLTPE  
Mmus\_CHD4 **MKKEASVKFHVLLTSYELITID**MAIL **GSIDWACLIVDEAHR**LKNNQSKFFRVNLGYSLQHK **LLLGTGPLQNNLE**ELFHLLNFLTPE

#### Helicase C-Terminal (CHD4)

Hsap\_CHD4 LLQKMLKNLKEGGH **RVLIFSQMTK**MLDLLDFLEHEGYKY **ER**IDGGITGNM **RQE**AIDRFNAPGAQQFCFLLSTRAGGLGINLATADTVIIYDS **WNPH**  
Ptro\_CHD4 LLQKMLKNLKEGGH **RVLIFSQMTK**MLDLLDFLEHEGYKYERIDGGITGNM **RQE**AIDRFNAPGAQQFCFLLSTRAGGLGINLATADTVIIYDS **WNPH**  
Mmul\_CHD4 LLQKMLKNLKEGGH **RVLIFSQMTK**MLDLLDFLEHEGYKYERIDGGITGNM **RQE**AIDRFNAPGAQQFCFLLSTRAGGLGINLATADTVIIYDS **WNPH**  
Fcat\_CHD4 LLQKMLKNLKEGGH **RVLIFSQMTK**MLDLLDFLEHEGYKYERIDGGITGNM **RQE**AIDRFNAPGAQQFCFLLSTRAGGLGINLATADTVIIYDS **WNPH**  
Rnor\_CHD4 LLQKMLKNLKEGGH **RVLIFSQMTK**MLDLLDFLEHEGYKYERIDGGITGNM **RQE**AIDRFNAPGAQQFCFLLSTRAGGLGINLATADTVIIYDS **WNPH**  
Mmus\_CHD4 LLQKMLKNLKEGGH **RVLIFSQMTK**MLDLLDFLEHEGYKYERIDGGITGNM **RQE**AIDRFNAPGAQQFCFLLSTRAGGLGINLATADTVIIYDS **WNPH**

Hsap\_CHD4 NDI **QAFSRAHRIGQNKVMIYRFVTR**ASVEERITQVAKKKMMLTHLVVRPGL  
Ptro\_CHD4 NDI **QAFSRAHRIGQNKVMIYRFVTR**ASVEERITQVAKKKMMLTHLVVRPGL  
Ptro\_CHD4 NDI **QAFSRAHRIGQNKVMIYRFVTR**ASVEERITQVAKKKMMLTHLVVRPGL  
Mmul\_CHD4 NDI **QAFSRAHRIGQNKVMIYRFVTR**ASVEERITQVAKKKMMLTHLVVRPGL  
Fcat\_CHD4 NDI **QAFSRAHRIGQNKVMIYRFVTR**ASVEERITQVAKKKMMLTHLVVRPGL  
Rnor\_CHD4 NDI **QAFSRAHRIGQNKVMIYRFVTR**ASVEERITQVAKKKMMLTHLVVRPGL  
Mmus\_CHD4 NDI **QAFSRAHRIGQNKVMIYRFVTR**ASVEERITQVAKKKMMLTHLVVRPGL

#### DUF1087 (CHD4)

CHD4\_Hsap IIKQEESVDPDYWEKLLRHHEQQQEDLARNLGKGKIRKQVNYNDGSQE  
CHD4\_Ptro IIKQEESVDPDYWEKLLRHHEQQQEDLARNLGKGKIRKQVNYNDGSQE  
CHD4\_Mmul IIKQEESVDPDYWEKLLRHHEQQQEDLARNLGKGKIRKQVNYNDGSQE  
CHD4\_Fcat IIKQEESVDPDYWEKLLRHHEQQQEDLARNLGKGKIRKQVNYNDGSQE  
CHD4\_Rnor IIKQEESVDPDYWEKLLRHHEQQQEDLARNLGKGKIRKQVNYNDGSQE  
CHD4\_Mmus IIKQEESVDPDYWEKLLRHHEQQQEDLARNLGKGKIRKQVNYNDGSQE

#### DUF1086 (CHD4)

CHD4\_Hsap RRP SRKGLRNDKDKPLPPLARVGGNIEVLGFNARQKAFLNAIMRYGMPPQDAFTTQWLVRDLRGKSEKEFKAYVSLFMRHLCEPGADGAETFADGV  
CHD4\_Ptro RRP SRKGLRNDKDKPLPPLARVGGNIEVLGFNARQKAFLNAIMRYGMPPQDAFTTQWLVRDLRGKSEKEFKAYVSLFMRHLCEPGADGAETFADGV  
CHD4\_Mmul RRP SRKGLRNDKDKPLPPLARVGGNIEVLGFNARQKAFLNAIMRYGMPPQDAFTTQWLVRDLRGKSEKEFKAYVSLFMRHLCEPGADGAETFADGV  
CHD4\_Fcat RRP SRKGLRNDKDKPLPPLARVGGNIEVLGFNARQKAFLNAIMRYGMPPQDAFTTQWLVRDLRGKSEKEFKAYVSLFMRHLCEPGADGAETFADGV  
CHD4\_Rnor RRP SRKGLRNDKDKPLPPLARVGGNIEVLGFNARQKAFLNAIMRYGMPPQDAFTTQWLVRDLRGKSEKEFKAYVSLFMRHLCEPGADGAETFADGV  
CHD4\_Mmus RRP SRKGLRNDKDKPLPPLARVGGNIEVLGFNARQKAFLNAIMRYGMPPQDAFTTQWLVRDLRGKSEKEFKAYVSLFMRHLCEPGADGAETFADGV

CHD4\_Hsap PREGLSRQHVLTRIGVMSLIRKKVQEF EHVNGRWSMP EL  
CHD4\_Ptro PREGLSRQHVLTRIGVMSLIRKKVQEF EHVNGRWSMP EL  
CHD4\_Mmul PREGLSRQHVLTRIGVMSLIRKKVQEF EHVNGRWSMP EL  
CHD4\_Fcat PREGLSRQHVLTRIGVMSLIRKKVQEF EHVNGRWSMP EL  
CHD4\_Rnor PREGLSRQHVLTRIGVMSLIRKKVQEF EHVNGRWSMP EL  
CHD4\_Mmus PREGLSRQHVLTRIGVMSLIRKKVQEF EHVNGRWSMP EL

#### PHD I (CHD5)

Hsap\_CHD5 QDYCEVCQQGGEIILCDTCPRAYHLVCLDPELEKAPEGKWSCPHCEKE  
Ptro\_CHD5 QDYCEVCQQGGEIILCDTCPRAYHLVCLDPELEKAPEGKWSCPHCEKE  
Mmul\_CHD5 QDYCEVCQQGGEIILCDTCPRAYHLVCLDPELEKAPEGKWSCPHCEKE  
Fcat\_CHD5 QDYCEVCQQGGEIILCDTCPRAYHLVCLDPELEKAPEGKWSCPHCEKE  
Rnor\_CHD5 QDYCEVCQQGGEIILCDTCPRAYHLVCLDPELEKAPEGKWSCPHCEKE  
Mmus\_CHD5 QDYCEVCQQGGEIILCDTCPRAYHLVCLDPELEKAPEGKWSCPHCEKE

#### PHD II (CHD5)

Hsap\_CHD5 MEFCRVCKDGGELLCCDACPSSYHLHCLNPPLPEIPNGEWLCPRCTCP  
Ptro\_CHD5 MEFCRVCKDGGELLCCDACPSSYHLHCLNPPLPEIPNGEWLCPRCTCP  
Mmul\_CHD5 MEFCRVCKDGGELLCCDACPSSYHLHCLNPPLPEIPNGEWLCPRCTCP  
Fcat\_CHD5 MEFCRVCKDGGELLCCDACPSSYHLHCLNPPLPEIPNGEWLCPRCTCP  
Rnor\_CHD5 MEFCRVCKDGGELLCCDACPSSYHLHCLNPPLPEIPNGEWLCPRCTCP  
Mmus\_CHD5 MEFCRVCKDGGELLCCDACPSSYHLHCLNPPLPEIPNGEWLCPRCTCP

#### Chromo 1 (CHD5)

Hsap\_CHD5 LPPPKPLEGIPERE **FFVKWAGLSYWHCSWVKELQLE**LYHTVMYRNYQRKNDMDEPPPF  
Ptro\_CHD5 LPPPKPLEGIPERE **FFVKWAGLSYWHCSWVKELQLE**LYHTVMYRNYQRKNDMDEPPPF  
Mmul\_CHD5 LPPPKPLEGIPERE **FFVKWAGLSYWHCSWVKELQLE**LYHTVMYRNYQRKNDMDEPPPF  
Fcat\_CHD5 VPPPKPLEGIPERE **FFVKWAGLSYWHCSWVKELQLE**LYHTVMYRNYQRKNDMDEPPPF  
Rnor\_CHD5 MPPPRPLEGIPERE **FFVKWAGLSYWHCSWVKELQLE**LYHTVMYRNYQRKNDMDEPPPF  
Mmus\_CHD5 MPPPRPLEGIPERE **FFVKWAGLSYWHCSWVKELQLE**LYHTVMYRNYQRKNDMDEPPPF

#### Chromo 2 (CHD5)

Hsap\_CHD5 MMIHRILNHSFDKKGDV **HYLIKWKDLPYDQCTWEID**IDIPYYDNLKQAYWGHRELMLGEDT  
Ptro\_CHD5 MMIHRILNHSFDKKGDV **HYLIKWKDLPYDQCTWEID**IDIPYYDNLKQAYWGHRELMLGEDT  
Mmul\_CHD5 MMIHRILNHSFDKKGDV **HYLIKWKDLPYDQCTWEID**IDIPYYDNLKQAYWGHRELMLGEDT  
Fcat\_CHD5 MMIHRILNHSFDKKGDV **HYLIKWKDLPYDQCTWEID**IDIPYYDNLKQAYWGHRELMLGEDA  
Rnor\_CHD5 MMVHRILNHSFDKKGDV **HYLIKWKDLPYDQCTWEID**IDIPYYDNLKQAYWGHRELMLGEDA



Mmus\_CHD5 MMHRLNHSFDKKGDIHYLIKWKDLPLYDQCTWEIDEIDIPYYDNLKQAYWGHRELMLGEDA

#### Helicase ATP-Binding (CHD5)

Hsap\_CHD5 RFSWAQGTDTILADEMGLGKTVQTIIVFLYSLYKEGHSKGPYLVSAPLSTIINWEREFEMWAPDFYVVITYTGDKESRSVIRENEFSFEDNAIRSGKKVF  
Ptro\_CHD5 RFSWAQGTDTILADEMGLGKTVQTIIVFLYSLYKEGHSKGPYLVSAPLSTIINWEREFEMWAPDFYVVITYTGDKESRSVIRENEFSFEDNAIRSGKKVF  
Mmu1\_CHD5 RFSWAQGTDTILADEMGLGKTVQTIIVFLYSLYKEGHSKGPYLVSAPLSTIINWEREFEMWAPDFYVVITYTGDKESRSVIRENEFSFEDNAIRSGKKVF  
Fcat\_CHD5 RFSWAQGTDTILADEMGLGKTVQTIIVFLYSLYKEGHSKGPYLVSAPLSTIINWEREFEMWAPDFYVVITYTGDKESRSVIRENEFSFEDNAIRSGKKVF  
Rnor\_CHD5 RFSWAQGTDTILADEMGLGKTVQTIIVFLYSLYKEGHSKGPYLVSAPLSTIINWEREFEMWAPDFYVVITYTGDKESRSVIRENEFSFEDNAIRSGKKVF  
Mmus\_CHD5 RFSWAQGTDTILADEMGLGKTVQTIIVFLYSLYKEGHSKGPYLVSAPLSTIINWEREFEMWAPDFYVVITYTGDKESRSVIRENEFSFEDNAIRSGKKVF

Hsap\_CHD5 RMKKEVQIKFHVLLTSYELITIDQAILGSIWACLVDDEAHLKNNQSKFFRVLSYKIDYKLLLGTGPLQNNLEELFHLNFLTPE  
Ptro\_CHD5 RMKKEVQIKFHVLLTSYELITIDQAILGSIWACLVDDEAHLKNNQSKFFRVLSYKIDYKLLLGTGPLQNNLEELFHLNFLTPE  
Mmu1\_CHD5 RMKKEVQIKFHVLLTSYELITIDQAILGSIWACLVDDEAHLKNNQSKFFRVLSYKIDYKLLLGTGPLQNNLEELFHLNFLTPE  
Fcat\_CHD5 RMKKEVQIKFHVLLTSYELITIDQAILGSIWACLVDDEAHLKNNQSKFFRVLSYKIDYKLLLGTGPLQNNLEELFHLNFLTPE  
Rnor\_CHD5 RMKKEVQIKFHVLLTSYELITIDQAILGSIWACLVDDEAHLKNNQSKFFRVLSYKIDYKLLLGTGPLQNNLEELFHLNFLTPE  
Mmus\_CHD5 RMKKEVQIKFHVLLTSYELITIDQAILGSIWACLVDDEAHLKNNQSKFFRVLSYKIDYKLLLGTGPLQNNLEELFHLNFLTPE

#### Helicase C-Terminal (CHD5)

Hsap\_CHD5 LLQKMLKKLRDEGHRVLIIFSQMTKMLDLLDFLEYEGYKIERIDGGITGGLRQEAI DRFNAPGAQQFCFLLSTRAGGLGINLATADTVIIYDSWNPHN  
Ptro\_CHD5 LLQKMLKKLRDEGHRVLIIFSQMTKMLDLLDFLEYEGYKIERIDGGITGGLRQEAI DRFNAPGAQQFCFLLSTRAGGLGINLATADTVIIYDSWNPHN  
Mmu1\_CHD5 LLQKMLKKLRDEGHRVLIIFSQMTKMLDLLDFLEYEGYKIERIDGGITGGLRQEAI DRFNAPGAQQFCFLLSTRAGGLGINLATADTVIIYDSWNPHN  
Fcat\_CHD5 LLQKMLKKLRDEGHRVLIIFSQMTKMLDLLDFLEYEGYKIERIDGGITGGLRQEAI DRFNAPGAQQFCFLLSTRAGGLGINLATADTVIIYDSWNPHN  
Rnor\_CHD5 LLQKMLKKLRDEGHRVLIIFSQMTKMLDLLDFLEYEGYKIERIDGGITGGLRQEAI DRFNAPGAQQFCFLLSTRAGGLGINLATADTVIIYDSWNPHN  
Mmus\_CHD5 LLQKMLKKLRDEGHRVLIIFSQMTKMLDLLDFLEYEGYKIERIDGGITGGLRQEAI DRFNAPGAQQFCFLLSTRAGGLGINLATADTVIIYDSWNPHN

Hsap\_CHD5 DIQAFSRAHRIGQNKKVMYRFVTRASVEERITQVAKRKMMTHLVVRPGLGSKSGSMTKQELDDIL  
Ptro\_CHD5 DIQAFSRAHRIGQNKKVMYRFVTRASVEERITQVAKRKMMTHLVVRPGLGSKSGSMTKQELDDIL  
Mmu1\_CHD5 DIQAFSRAHRIGQNKKVMYRFVTRASVEERITQVAKRKMMTHLVVRPGLGSKSGSMTKQELDDIL  
Fcat\_CHD5 DIQAFSRAHRIGQNKKVMYRFVTRASVEERITQVAKRKMMTHLVVRPGLGSKSGSMTKQELDDIL  
Rnor\_CHD5 DIQAFSRAHRIGQNKKVMYRFVTRASVEERITQVAKRKMMTHLVVRPGLGSKSGSMTKQELDDIL  
Mmus\_CHD5 DIQAFSRAHRIGQNKKVMYRFVTRASVEERITQVAKRKMMTHLVVRPGLGSKSGSMTKQELDDIL

#### DUF1087 (CHD5)

CHD5\_Hsap EDGVEEVEREIIKQEENVDPDYWEKLLRHHYEQQQEDLARNLGKGRIRKQVNYNDASQE  
CHD5\_Ptro EDGVEEVEREIIKQEENVDPDYWEKLLRHHYEQQQEDLARNLGKGRIRKQVNYNDASQE  
CHD5\_Mmu1 EDGVEEVEREIIKQEENVDPDYWEKLLRHHYEQQQEDLARNLGKGRIRKQVNYNDASQE  
CHD5\_Fcat EDGVEEVEREIIKQEENVDPDYWEKLLRHHYEQQQEDLARNLGKGRIRKQVNYNDASQE  
CHD5\_Rnor EDGVEEVEREIIKQEENVDPDYWEKLLRHHYEQQQEDLARNLGKGRIRKQVNYNDASQE  
CHD5\_Mmus EDGVEEVEREIIKQEENVDPDYWEKLLRHHYEQQQEDLARNLGKGRIRKQVNYNDASQE

#### DUF1086 (CHD5)

CHD5\_Hsap EGQSGRRQSRRLKSDRDKPLPPLLARVGGNIEVLGFNARQKAFNAIMRWGMPPQDAFNHSHLVRDLRGKSEKEFRAYVSLFMRHLCPEGDGAETF  
CHD5\_Ptro EGQSGRRQSRRLKSDRDKPLPPLLARVGGNIEVLGFNARQKAFNAIMRWGMPPQDAFNHSHLVRDLRGKSEKEFRAYVSLFMRHLCPEGDGAETF  
CHD5\_Mmu1 EGQSGRRQSRRLKSDRDKPLPPLLARVGGNIEVLGFNARQKAFNAIMRWGMPPQDAFNHSHLVRDLRGKSEKEFRAYVSLFMRHLCPEGDGAETF  
CHD5\_Fcat EGQSGRRQSRRLKSDRDKPLPPLLARVGGNIEVLGFNARQKAFNAIMRWGMPPQDAFNHSHLVRDLRGKSEKEFRAYVSLFMRHLCPEGDGAETF  
CHD5\_Rnor EGQSGRRQSRRLKSDRDKPLPPLLARVGGNIEVLGFNARQKAFNAIMRWGMPPQDAFNHSHLVRDLRGKSEKEFRAYVSLFMRHLCPEGDGAETF  
CHD5\_Mmus EGQSGRRQSRRLKSDRDKPLPPLLARVGGNIEVLGFNARQKAFNAIMRWGMPPQDAFNHSHLVRDLRGKSEKEFRAYVSLFMRHLCPEGDGAETF

CHD5\_Hsap ADGVPREGLSRQHVLTRIGVMSLVRKKVQEFHVNGKYSTPDL  
CHD5\_Ptro ADGVPREGLSRQHVLTRIGVMSLVRKKVQEFHVNGKYSTPDL  
CHD5\_Mmu1 ADGVPREGLSRQHVLTRIGVMSLVRKKVQEFHVNGKYSTPDL  
CHD5\_Fcat ADGVPREGLSRQHVLTRIGVMSLVRKKVQEFHVNGKYSTPDL  
CHD5\_Rnor ADGVPREGLSRQHVLTRIGVMSLVRKKVQEFHVNGKYSTPDL  
CHD5\_Mmus ADGVPREGLSRQHVLTRIGVMSLVRKKVQEFHVNGKYSTPDL

#### Group III

##### Chromo 1 (CHD6)

Hsap\_CHD6 NII EKILASKTVQEVHPGEPFDLELFYVKYRNFSYLHCKWATMEEL EKDPR  
Ptro\_CHD6 NII EKILASKTVQEVHPGEPFDLELFYVKYRNFSYLHCKWATMEEL EKDPR  
Mmu1\_CHD6 NII EKILASKTVQEVHPGEPFDLELFYVKYRNFSYLHCKWATMEEL EKDPR  
Fcat\_CHD6 NII EKILASKTVQEVHPGEPFDLELFYVKYRNFSYLHCKWATMEEL EKDPR  
Rnor\_CHD6 NII EKILASKTVQEVHPGEPFDLELFYVKYRNFSYLHCKWATMEEL EKDPR  
Mmus\_CHD6 NII EKILASKTVQEVHPGEPFDLELFYVKYRNFSYLHCKWATMEEL EKDPR

##### Chromo 2 (CHD6)

Hsap\_CHD6 VEVDRI LEVAHTKDAETGEEVTHYLVKWCSLPYEESTWELEEDVDP AKVKEFESLQVLPEIKHVE  
Ptro\_CHD6 VEVDRI LEVAHTKDAETGEEVTHYLVKWCSLPYEESTWELEEDVDP AKVKEFESLQVLPEIKHVE  
Mmu1\_CHD6 VEVDRI LEVAHTKDAETGEEVTHYLVKWCSLPYEESTWELEEDVDP AKVKEFESLQVLPEIKHVE  
Fcat\_CHD6 VEVDRI LEVAHTKDAETGEEVTHYLVKWCSLPYEESTWELEEDVDP AKVKEFESLQVLPEIKHVE  
Rnor\_CHD6 TEIDRI LEVAHTKDAETGEEVTHYLVKWCSLPYEESTWELEEDVDP AKVKEFESLQVLPEIKHVE  
Mmus\_CHD6 TEIDRI LEVAHTKDAETGEEVTHYLVKWCSLPYEESTWELEEDVDP AKVKEFESLQVLPEIKHVE

#### Helicase ATP-Binding (CHD6)

Hsap\_CHD6 LFNWYNRKNCILADEMGLGKTIQSIITFLSEIFLRGIHGPFLLIAPLSTITNWEREFRTWTENNAIVYHGSQISRQMIQQYEMVYRDAQGNP  
Ptro\_CHD6 LFNWYNRKNCILADEMGLGKTIQSIITFLSEIFLRGIHGPFLLIAPLSTITNWEREFRTWTENNAIVYHGSQISRQMIQQYEMVYRDAQGNP  
Mmu1\_CHD6 LFNWYNRKNCILADEMGLGKTIQSIITFLSEIFLRGIHGPFLLIAPLSTITNWEREFRTWTENNAIVYHGSQISRQMIQQYEMVYRDAQGNP  
Fcat\_CHD6 LFNWYNRKNCILADEMGLGKTIQSIITFLSEIFLRGIHGPFLLIAPLSTITNWEREFRTWTENNAIVYHGSQISRQMIQQYEMVYRDAQGNP  
Rnor\_CHD6 LFNWYNRKNCILADEMGLGKTIQSIITFLSEIFLRGIHGPFLLIAPLSTITNWEREFRTWTENNAIVYHGSQISRQMIQQYEMVYRDAQGNP



Mmus\_CHD6 LFNWYNRNKCILADEMGLGKTIQSIIFLSEIFVRGIHGPFLLIIAPLSTIPNWEREFRTWTEMNIAIVYHGSQISRQMIQQYEMVYRDAQGNP

Hsap\_CHD6 LSGVFKFHVVITTFEMILADCPSELKKIHWSCVVIDEAHRLKNRNCKLLEGLKMALEHKVLLTGTPLQNSVEELFSLNLFLEPS  
Ptro\_CHD6 LSGVFKFHVVITTFEMILADCPSELKKIHWSCVVIDEAHRLKNRNCKLLEGLKMALEHKVLLTGTPLQNSVEELFSLNLFLEPS  
Mmul\_CHD6 LSGVFKFHVVITTFEMILADCPSELKKIHWSCVVIDEAHRLKNRNCKLLEGLKMALEHKVLLTGTPLQNSVEELFSLNLFLEPS  
Fcat\_CHD6 LSGVFKFHVVITTFEMILADCPSELKKIHWSCVVIDEAHRLKNRNCKLLEGLKMALEHKVLLTGTPLQNSVEELFSLNLFLEPS  
Rnor\_CHD6 LSGVFKFHVVITTFEMILADCPSELKKIHWSCVVIDEAHRLKNRNCKLLEGLKMALEHKVLLTGTPLQNSVEELFSLNLFLEPS  
Mmus\_CHD6 LSGVFKFHVVITTFEMILADCPSELKKIHWSCVVIDEAHRLKNRNCKLLEGLKMALEHKVLLTGTPLQNSVEELFSLNLFLEPS

#### Helicase C-Terminal (CHD6)

Hsap\_CHD6 LIDKLLPKLIAGGHKVLIFSQMVRCLDILEDYLIQRRYTYERIDGRVRGNLRQAAIDRFCKPDSDRFVFLLCRAGGLGINLTAADTCIIF  
Ptro\_CHD6 LIDKLLPKLIAGGHKVLIFSQMVRCLDILEDYLIQRRYTYERIDGRVRGNLRQAAIDRFCKPDSDRFVFLLCRAGGLGINLTAADTCIIF  
Mmul\_CHD6 LIDKLLPKLIAGGHKVLIFSQMVRCLDILEDYLIQRRYTYERIDGRVRGNLRQAAIDRFCKPDSDRFVFLLCRAGGLGINLTAADTCIIF  
Fcat\_CHD6 LIDKLLPKLIAGGHKVLIFSQMVRCLDILEDYLIQRRYTYERIDGRVRGNLRQAAIDRFCKPDSDRFVFLLCRAGGLGINLTAADTCIIF  
Rnor\_CHD6 LIDKLLPKLIAGGHKVLIFSQMVRCLDILEDYLIQRRYTYERIDGRVRGNLRQAAIDRFCKPDSDRFVFLLCRAGGLGINLTAADTCIIF  
Mmus\_CHD6 LIDKLLPKLIAGGHKVLIFSQMVRCLDILEDYLIQRRYTYERIDGRVRGNLRQAAIDRFCKPDSDRFVFLLCRAGGLGINLTAADTCIIF

Hsap\_CHD6 DSDWNPQNDLQAQARCHRIGQSKAVKVYRLITRNSYEREMFDKASLKLGLDKAVLQDINRKGSTNGVQQLSKMEVEDLL  
Ptro\_CHD6 DSDWNPQNDLQAQARCHRIGQSKAVKVYRLITRNSYEREMFDKASLKLGLDKAVLQDINRKGSTNGVQQLSKMEVEDLL  
Mmul\_CHD6 DSDWNPQNDLQAQARCHRIGQSKAVKVYRLITRNSYEREMFDKASLKLGLDKAVLQDINRKGSTNGVQQLSKMEVEDLL  
Fcat\_CHD6 DSDWNPQNDLQAQARCHRIGQSKAVKVYRLITRNSYEREMFDKASLKLGLDKAVLQDINRKGSTNGVQQLSKMEVEDLL  
Rnor\_CHD6 DSDWNPQNDLQAQARCHRIGQSKAVKVYRLITRNSYEREMFDKASLKLGLDKAVLQDINRKGSTNGVQQLSKMEVEDLL  
Mmus\_CHD6 DSDWNPQNDLQAQARCHRIGQSKAVKVYRLITRNSYEREMFDKASLKLGLDKAVLQDINRKGSTNGVQQLSKMEVEDLL

#### SANT (CHD6)

Hsap\_CHD6 AQKRWRREQADFYRTVSSFGVVYDQEKKTFDWTQFRIISRLDKKSDESLEQYFYSFVAM  
Ptro\_CHD6 AQKRWRREQADFYRTVSSFGVVYDQEKKTFDWTQFRIISRLDKKSDESLEQYFYSFVAM  
Mmul\_CHD6 AQKRWRREQADFYRTVSSFGVVYDQEKKTFDWTQFRIISRLDKKSDESLEQYFYSFVAM  
Fcat\_CHD6 AQKRWRREQADFYRAVSSFGVVYDQEKKTFDWTQFRIISRLDKKSDESLEHYFYSFVAM  
Rnor\_CHD6 AQKRWRREQADFYRTVSSFGVVYDQEKAFDWTQFRAISRLDKKSDENLEHYFHSFVAM  
Mmus\_CHD6 AQKRWRREQADFYRTVSSFGVVYDQEKKAFDWTQFRIISRLDKKSDESLEHYFYSFVAM

#### BRK (CHD6)

Hsap\_CHD6 SGEERVPAIPKEPGLRGFLPENKFNHTLAEPILRDT  
Ptro\_CHD6 SGEERVPAIPKEPGLRGFLPENKFNHTLAEPILRDT  
Mmul\_CHD6 SGEERVPAVPKEPGLRGFLPENKFNHTLGEVPLRDT  
Fcat\_CHD6 SGEERVPAVPKEPGLRGFLPENKFNHTLAEPVLRDA  
Rnor\_CHD6 GGEERVSAVPKEPGLRGFLPESKFNHTLAEPVLRDA  
Mmus\_CHD6 GGEERVPAVPKEPGLRGFLPESKFNHTLAEPVLRDA

#### Chromo 1 (CHD7)

Hsap\_CHD7 PVVEKIMSSRSVKKQKESGEEVEIEEFYVKYKNFSYLHCQWASIEDLEKDKRIQQKIKRFKAKQGQNK  
Ptro\_CHD7 PVVEKIMSSRSVKKQKESGEEVEIEEFYVKYKNFSYLHCQWASIEDLEKDKRIQQKIKRFKAKQGQNK  
Mmul\_CHD7 PVVEKIMSSRSVKKQKESGEEVEIEEFYVKYKNFSYLHCQWASVEDLEKDKRIQQKIKRFKAKQGQNK  
Fcat\_CHD7 PVVEKIMSSRSKKQKDSGEEIEVEEFYVKYKNFSYLHCQWASVEDLEKDKRIQQKIKRFKAKQGQNK  
Rnor\_CHD7 PVVEKIMSSRLVKKQKESGEEVEIEEFYVKYKNFSYLHCQWASVEDLEKDKRIQQKIKRFKSKQGQSK  
Mmus\_CHD7 PVVEKIMSSRLVKKQKESGEEVEIEEFYVKYKNFSYLHCQWASVEDLEKDKRIQQKIKRFKSKQGQSK

#### Chromo 2 (CHD7)

Hsap\_CHD7 VEVDRIIMDFARSTDDRGEPTHYLVKWCSLPYEDSTWERRQDIDQAKIEEFELMSREPETERVER  
Ptro\_CHD7 VEVDRIIMDFARSTDDRGEPTHYLVKWCSLPYEDSTWERRQDIDQAKIEEFELMSREPETERVER  
Mmul\_CHD7 VEVDRIIMDFARSTDDRGEPTHYLVKWCSLPYEDSTWERRQDIDQAKIEEFELMSREPETERVER  
Fcat\_CHD7 VEVDRIIMDFARSTDERGEPTHYLVKWCSLPYEDSTWELRQDIDQAKIEEFELMSREPETERVER  
Rnor\_CHD7 VEVDRIIMDFARSTDDRGEPTHYLVKWCSLPYEDSTWELRQDIDQAKIEEFELMSREPETERVER  
Mmus\_CHD7 VEVDRIIMDFARSTDDRGEPTHYLVKWCSLPYEDSTWELRQDIDQAKIEEFELMSREPETERVER

#### Helicase ATP-Binding (CHD7)

Hsap\_CHD7 LFNWYNMRNCILADEMGLGKTIQSITFLYEIYLKGIHGPFLLVIAPLSTIPNWEREFRTWTELNVVVYHGSQASRRTIQLYEMYFKDPQGRV  
Ptro\_CHD7 LFNWYNMRNCILADEMGLGKTIQSITFLYEIYLKGIHGPFLLVIAPLSTIPNWEREFRTWTELNVVVYHGSQASRRTIQLYEMYFKDPQGRV  
Mmul\_CHD7 LFNWYNMRNCILADEMGLGKTIQSITFLYEIYLKGIHGPFLLVIAPLSTIPNWEREFRTWTELNVVVYHGSQASRRTIQLYEMYFKDPQGRV  
Fcat\_CHD7 LFNWYNMRNCILADEMGLGKTIQSITFLYEIYLKGIHGPFLLVIAPLSTIPNWEREFRTWTELNVVVYHGSQASRRTIQLYEMYFKDPQGRV  
Rnor\_CHD7 LFNWYNMRNCILADEMGLGKTIQSITFLYEIYLKGIHGPFLLVIAPLSTIPNWEREFRTWTELNVVVYHGSQASRRTIQLYEMYFKDPQGRV  
Mmus\_CHD7 LFNWYNMRNCILADEMGLGKTIQSITFLYEIYLKGIHGPFLLVIAPLSTIPNWEREFRTWTELNVVVYHGSQASRRTIQLYEMYFKDPQGRV

Hsap\_CHD7 IKGSYKFHAIITTFEMILTDCEPRLNIPWRCVVIDEAHRLKNRNCKLLEGLKMMDELEHKVLLTGTPLQNTVEELFSLHFLLEPS  
Ptro\_CHD7 IKGSYKFHAIITTFEMILTDCEPRLNIPWRCVVIDEAHRLKNRNCKLLEGLKMMDELEHKVLLTGTPLQNTVEELFSLHFLLEPS  
Mmul\_CHD7 IKGSYKFHAIITTFEMILTDCEPRLNIPWRCVVIDEAHRLKNRNCKLLEGLKMMDELEHKVLLTGTPLQNTVEELFSLHFLLEPS  
Fcat\_CHD7 IKGSYKFHAIITTFEMILTDCEPRLNIPWRCVVIDEAHRLKNRNCKLLEGLKMMDELEHKVLLTGTPLQNTVEELFSLHFLLEPS  
Rnor\_CHD7 IKGSYKFHAIITTFEMILTDCEPRLNIPWRCVVIDEAHRLKNRNCKLLEGLKMMDELEHKVLLTGTPLQNTVEELFSLHFLLEPS  
Mmus\_CHD7 IKGSYKFHAIITTFEMILTDCEPRLNIPWRCVVIDEAHRLKNRNCKLLEGLKMMDELEHKVLLTGTPLQNTVEELFSLHFLLEPS

#### Helicase C-Terminal (CHD7)

Hsap\_CHD7 LIDKLLPKLKAGGHRVLIFSQMVRCLDILEDYLIQRRYPYERIDGRVRGNLRQAAIDRFCKPDSDRFVFLLCRAGGLGINLTAADTCIIF  
Ptro\_CHD7 LIDKLLPKLKAGGHRVLIFSQMVRCLDILEDYLIQRRYPYERIDGRVRGNLRQAAIDRFCKPDSDRFVFLLCRAGGLGINLTAADTCIIF  
Mmul\_CHD7 LIDKLLPKLKAGGHRVLIFSQMVRCLDILEDYLIQRRYPYERIDGRVRGNLRQAAIDRFCKPDSDRFVFLLCRAGGLGINLTAADTCIIF  
Fcat\_CHD7 LIDKLLPKLKAGGHRVLIFSQMVRCLDILEDYLIQRRYPYERIDGRVRGNLRQAAIDRFCKPDSDRFVFLLCRAGGLGINLTAADTCIIF  
Rnor\_CHD7 LIDKLLPKLKAGGHRVLIFSQMVRCLDILEDYLIQRRYPYERIDGRVRGNLRQAAIDRFCKPDSDRFVFLLCRAGGLGINLTAADTCIIF

Mmus\_CHD7 LIDKLLPKLKAGGHRVLIFSQMVRCLDILEDYLIQRRYPYERIDGRVRGNLRQAAIDRFSPDSDRFVFLLCSTRAGGLGINLTAADTCIIF

Hsap\_CHD7 DSDWNPQNDLQAQARCHRIGQSKSVKIYRLITRNSYEREMFDKASLKLGLDKAVLQSMGRENATNGVQQLSKKEIEDLL  
Ptro\_CHD7 DSDWNPQNDLQAQARCHRIGQSKSVKIYRLITRNSYEREMFDKASLKLGLDKAVLQSMGRENATNGVQQLSKKEIEDLL  
Mmul\_CHD7 DSDWNPQNDLQAQARCHRIGQSKSVKIYRLITRNSYEREMFDKASLKLGLDKAVLQSMGRENATNGVQQLSKKEIEDLL  
Fcat\_CHD7 DSDWNPQNDLQAQARCHRIGQSKSVKIYRLITRNSYEREMFDKASLKLGLDKAVLQSMGRENATNGVQQLSKKEIEDLL  
Rnor\_CHD7 DSDWNPQNDLQAQARCHRIGQSKSVKIYRLITRNSYEREMFDKASLKLGLDKAVLQSMGRENATNGVQQLSKKEIEDLL  
Mmus\_CHD7 DSDWNPQNDLQAQARCHRIGQSKSVKIYRLITRNSYEREMFDKASLKLGLDKAVLQSMGRENATNGVQQLSKKEIEDLL

#### SANT (CHD7)

CHD7\_Hsap KRQKWTRREADFYRVVSTFGVIFDPVKQQFDWNQFAFARLDKKSDESLEKYFSCFVAM  
CHD7\_Ptro KRQKWTRREADFYRVVSTFGVIFDPVKQQFDWNQFAFARLDKKSDESLEKYFSCFVAM  
CHD7\_Mmul KRQKWTRREADFYRVVSTFGVIFDPVKQQFDWNQFAFARLDKKSDESLEKYFSCFVAM  
CHD7\_Fcat KRQKWTRREADFYRVVSTFGVIFDPMKQQFDWNQFAFARLDKKSDESLEKYFSCFVAM  
CHD7\_Rnor KRQKWTRREADFYRVVSTFGVIFDPVKQQFDWNQFAFARLDKKSDESLEKYFSCFVAM  
CHD7\_Mmus KRQKWTRREADFYRVVSTFGVIFDPVKQQFDWNQFAFARLDKKSDESLEKYFSCFVAM

#### BRK (CHD7)

Hsap\_CHD7 LDPDTRIPVINLEDGTRLVGEDAPKNKDLVEWLKLHPTTYTVD  
Ptro\_CHD7 LDPDTRIPVINLEDGTRLVGEDAPKNKDLVEWLKLHPTTYTVD  
Mmul\_CHD7 LDPDTRIPVINLEDGTRLVGEDAPKNKDLVEWLKLHPTTYTVD  
Fcat\_CHD7 LDPDTRIPVINLEDGTRLVGEDAPKNKDLVEWLKLHPTTYTVD  
Rnor\_CHD7 LDPDTRIPVINLEDGTRLVGEEAPKNKDLVDWLKLHPMYTVD  
Mmus\_CHD7 LDPDTRIPVINLEDGTRLVGEDAPKNKDLVDWLKLHPTTYTVD

#### BRK (CHD7)

Hsap\_CHD7 TGEERVVVNKRNGKKMGAMAPPMKDLPRWLEENPEFAVAPDWT  
Ptro\_CHD7 TGEERVVVNKRNGKKMGAMAPPMKDLPRWLEENPEFAVAPDWT  
Mmul\_CHD7 TGEERVVVNKRNGKKMGAMAPPMKDLPRWLEENPEFAVAPDWT  
Fcat\_CHD7 TGEERVVVNKRNGKKMGAMAPPMKDLPRWLEENPEFAVAPDWT  
Rnor\_CHD7 TGEERVVVNKRNGKKMGAMAPPMKDLPRWLEENPEFAVAPDWT  
Mmus\_CHD7 TGEERVVVNKRNGKKMGAMAPPMKDLPRWLEENPEFAVAPDWT

#### Chromo 1 (CHD8)

Hsap\_CHD8 AIVDKVLSMRIVKKELPSGQYTEAEFFVKYKNYSYLHCEWATISQLEKDKRIHQKLKRFKTKMAQMR  
Ptro\_CHD8 AIVDKVLSMRIVKKELPSGQYTEAEFFVKYKNYSYLHCEWATISQLEKDKRIHQKLKRFKTKMAQMR  
Mmul\_CHD8 AIVDKVLSMRIVKKELPSGQYTEAEFFVKYKNYSYLHCEWATISQLEKDKRIHQKLKRFKTKMAQMR  
Fcat\_CHD8 AIVDKVLSMRIVKKELPSGQYTEAEFFVKYKNYSYLHCEWATISQLEKDKRIHQKLKRFKTKMAQMR  
Rnor\_CHD8 AIVDKVLSMRIVKKELPSGQYTEAEFFVKYKNYSYLHCEWATISQLEKDKRIHQKLKRFKTKMAQMR  
Mmus\_CHD8 AIVDKVLSMRIVKKELPSGQYTEAEFFVKYKNYSYLHCEWATISQLEKDKRIHQKLKRFKTKMAQMR

#### Chromo 2 (CHD8)

Hsap\_CHD8 VEVDRILEDESHSDKDNGEPIIYLVKWCSLPYEDSTWELKEDVDEGKIREFKRIQSRHPELKRVRN  
Ptro\_CHD8 VEVDRILEDESHSDKDNGEPIIYLVKWCSLPYEDSTWELKEDVDEGKIREFKRIQSRHPELKRVRN  
Mmul\_CHD8 VEVDRILEDESHSDKDNGEPIIYLVKWCSLPYEDSTWELKEDVDEGKIREFKRIQSRHPELKRVRN  
Fcat\_CHD8 VEVDRILEDESHSDKDNGEPIIYLVKWCSLPYEDSTWELKEDVDEGKIREFKRIQSRHPELKRVRN  
Rnor\_CHD8 VEVDRILEDESHSDKDNGEPIIYLVKWCSLPYEDSTWELKEDVDEGKIREFKRIQSRHPELKRVRN  
Mmus\_CHD8 VEVDRILEDESHSDKDNGEPIIYLVKWCSLPYEDSTWELKEDVDEGKIREFKRIQSRHPELKRVRN

#### Helicase ATP-Binding (CHD8)

Hsap\_CHD8 LFNWYNRQNCILADEMGLGKTIQSIAFLQEVYVNGIHGPFLLVIAPLSTITNWEREFNTWTEMNITIVYHGLASRQMIQQYEMECKDSRGRLL  
Ptro\_CHD8 LFNWYNRQNCILADEMGLGKTIQSIAFLQEVYVNGIHGPFLLVIAPLSTITNWEREFNTWTEMNITIVYHGLASRQMIQQYEMECKDSRGRLL  
Mmul\_CHD8 LFNWYNRQNCILADEMGLGKTIQSIAFLQEVYVNGIHGPFLLVIAPLSTITNWEREFNTWTEMNITIVYHGLASRQMIQQYEMECKDSRGRLL  
Fcat\_CHD8 LFNWYNRQNCILADEMGLGKTIQSIAFLQEVYVNGIHGPFLLVIAPLSTITNWEREFNTWTEMNITIVYHGLASRQMIQQYEMECKDSRGRLL  
Rnor\_CHD8 LFNWYNRQNCILADEMGLGKTIQSIAFLQEVYVNGIHGPFLLVIAPLSTITNWEREFNTWTEMNITIVYHGLASRQMIQQYEMECKDSRGRLL  
Mmus\_CHD8 LFNWYNRQNCILADEMGLGKTIQSIAFLQEVYVNGIHGPFLLVIAPLSTITNWEREFNTWTEMNITIVYHGLASRQMIQQYEMECKDSRGRLL

Hsap\_CHD8 IPGAYKFDALITTFEMILSDCPELREIEWRCVIDEAHRLLKNRNCKLLDSLKHMDLEHKVLLTGTPQLNTVEELFSLHFLFLEPS  
Ptro\_CHD8 IPGAYKFDALITTFEMILSDCPELREIEWRCVIDEAHRLLKNRNCKLLDSLKHMDLEHKVLLTGTPQLNTVEELFSLHFLFLEPS  
Mmul\_CHD8 IPGAYKFDALITTFEMILSDCPELREIEWRCVIDEAHRLLKNRNCKLLDSLKHMDLEHKVLLTGTPQLNTVEELFSLHFLFLEPS  
Fcat\_CHD8 IPGAYKFDALITTFEMILSDCPELREIEWRCVIDEAHRLLKNRNCKLLDSLKHMDLEHKVLLTGTPQLNTVEELFSLHFLFLEPS  
Rnor\_CHD8 IPGAYKFDALITTFEMILSDCPELREIEWRCVIDEAHRLLKNRNCKLLDSLKHMDLEHKVLLTGTPQLNTVEELFSLHFLFLEPS  
Mmus\_CHD8 IPGAYKFDALITTFEMILSDCPELREIEWRCVIDEAHRLLKNRNCKLLDSLKHMDLEHKVLLTGTPQLNTVEELFSLHFLFLEPS

#### Helicase C-Terminal (CHD8)

Hsap\_CHD8 LIDKLLPKLKAGGHRVLIFSQMVRCLDILEDYLIQRRYLYERIDGRVRGNLRQAAIDRFSPDSDRFVFLLCSTRAGGLGINLTAADTCIIF  
Ptro\_CHD8 LIDKLLPKLKAGGHRVLIFSQMVRCLDILEDYLIQRRYLYERIDGRVRGNLRQAAIDRFSPDSDRFVFLLCSTRAGGLGINLTAADTCIIF  
Mmul\_CHD8 LIDKLLPKLKAGGHRVLIFSQMVRCLDILEDYLIQRRYLYERIDGRVRGNLRQAAIDRFSPDSDRFVFLLCSTRAGGLGINLTAADTCIIF  
Fcat\_CHD8 LIDKLLPKLKAGGHRVLIFSQMVRCLDILEDYLIQRRYLYERIDGRVRGNLRQAAIDRFSPDSDRFVFLLCSTRAGGLGINLTAADTCIIF  
Rnor\_CHD8 LIDKLLPKLKAGGHRVLIFSQMVRCLDILEDYLIQRRYLYERIDGRVRGNLRQAAIDRFSPDSDRFVFLLCSTRAGGLGINLTAADTCIIF  
Mmus\_CHD8 LIDKLLPKLKAGGHRVLIFSQMVRCLDILEDYLIQRRYLYERIDGRVRGNLRQAAIDRFSPDSDRFVFLLCSTRAGGLGINLTAADTCIIF

Hsap\_CHD8 DSDWNPQNDLQAQARCHRIGQSKAVKVYRLITRNSYEREMFDKASLKLGLDKAVLQSMGR  
Ptro\_CHD8 DSDWNPQNDLQAQARCHRIGQSKAVKVYRLITRNSYEREMFDKASLKLGLDKAVLQSMGR  
Mmul\_CHD8 DSDWNPQNDLQAQARCHRIGQSKAVKVYRLITRNSYEREMFDKASLKLGLDKAVLQSMGR  
Fcat\_CHD8 DSDWNPQNDLQAQARCHRIGQSKAVKVYRLITRNSYEREMFDKASLKLGLDKAVLQSMGR  
Rnor\_CHD8 DSDWNPQNDLQAQARCHRIGQSKAVKVYRLITRNSYEREMFDKASLKLGLDKAVLQSMGR  
Mmus\_CHD8 DSDWNPQNDLQAQARCHRIGQSKAVKVYRLITRNSYEREMFDKASLKLGLDKAVLQSMGR

#### SANT (CHD8)

Hsap\_CHD8 KQQRWTRREQTDFYRVVSTFGVEYDPDTMQFHWDRTFARLDKKTDES LTKYFHGFVAM  
Ptro\_CHD8 KQQRWTRREQTDFYRVVSTFGVEYDPDTMQFHWDRTFARLDKKTDES LTKYFHGFVAM  
Mmul\_CHD8 KQQRWTRREQTDFYRVVSTFGVEYDPDTMQFHWDRTFARLDKKTDES LTKYFHGFVAM  
Fcat\_CHD8 KQQRWTRREQTDFYRVVSTFGVEYDPDTMQFHWDRTFARLDKKTDES LTKYFHGFVAM  
Rnor\_CHD8 KQQRWTRREQTDFYRVVSTFGVEYDPDTMQFHWDRTFARLDKKTDES LTKYFHGFVAM

Mmus\_CHD8 KQQRWTRREQTFYRVVSTFGVEYDPDNMQFHWDRFRTFARLDKKTDESLTKYFHGFVAM

#### BRK (CHD8)

Hsap\_CHD8 DLETRIPVINKVDGTL LVGEDAPRRAELEMWLQGHPEFAVDPRFL  
Ptro\_CHD8 DLETRIPVINKVDGTL LVGEDAPRRAELEMWLQGHPEFAVDPRFL  
Mmul\_CHD8 DLETRIPVINKVDGTL LVGEDAPRRAELEMWLQGHPEFAVDPRFL  
Fcat\_CHD8 DLETRIPVINKVDGTL LVGEDAPRRAELEMWLQGHPEFAVDPRFL  
Rnor\_CHD8 DLETRIPVINKVDGTL LVGEDAPRRAELEMWLQGHPEFAVDPRFL  
Mmus\_CHD8 DLETRIPVINKVDGTL LVGEDAPRRAELEMWLQGHPEFAVDPRFL

#### BRK (CHD8)

Hsap\_CHD8 LGMEPVQTANSRNGKKGHHTETVFNRVLPGPIAPESSKKRA  
Ptro\_CHD8 LGMEPVQTANSRNGKKGHHTETVFNRVLPGPIAPESSKKRA  
Mmul\_CHD8 LGMEPVQTANSRNGKKGHHTETVFNRVLPGPIAPESSKKRA  
Fcat\_CHD8 LGVEPVQTANSRNGKKGHAETVFNRVLPGPIAPDSSKKRA  
Rnor\_CHD8 LGMEPVQPANSRNGKKGHYAETAFNRVLPGPIAPENSKKRV  
Mmus\_CHD8 LGMEPVQPANSRNGKKGHYAETAFNRVLPGPVAPENSKKRV

#### Chromo 1 (CHD9)

Hsap\_CHD9 AIVDKILSSRTVKKEISPGVMIDTEEFFVKYKNYSYLHCEWATEEQQLKDKRIQQKIKRFLRQAQRAHFFA  
Ptro\_CHD9 AIVDKILSSRTVKKEISPGVMIDTEEFFVKYKNYSYLHCEWATEEQQLKDKRIQQKIKRFLRQAQRAHFFA  
Mmul\_CHD9 AIVDKILSSRTVKKEISPGVMIDTEEFFVKYKNYSYLHCEWATEEQQLKDKRIQQKIKRFLRQAQRAHFFA  
Fcat\_CHD9 AIVDKILSSRTVKKEISPGVMIDTEEFFVKYKNYSYLHCEWATEEQQLKDKRIQQKIKRFLRQAQRAHFFA  
Rnor\_CHD9 AIVDKILACRTYKKEVSPGVMIDTEEFFVKYKNYSYLHCEWATEEQQLKDKRIQQKIKRFLRQAQRAHFLA  
Mmus\_CHD9 AIVDKILACRTYKKEVSPGVMIDTEEFFVKYKNYSYLHCEWATEEQQLKDKRIQQKIKRFLRQAQRAHFLA

#### Chromo 2 (CHD9)

Hsap\_CHD9 VEVDRLVLEVSFCEDKDTGEPVIYYLVKWCSLPYEDSTWELKEDVPLAKIEEFQEQASRPDTRRLDR  
Ptro\_CHD9 VEVDRLVLEVSFCEDKDTGEPVIYYLVKWCSLPYEDSTWELKEDVPLAKIEEFQEQASRPDTRRLDR  
Mmul\_CHD9 VEVDRLVLEVSFCEDKDTGEPVIYYLVKWCSLPYEDSTWELKEDVPLAKIEEFQEQASRPDTRRLDR  
Fcat\_CHD9 VEVDRLVLEVSFCEDKDTGEPVIYYLVKWCSLPYEDSTWELKEDVPLAKIEEFQEQASRPDTRHLDLDR  
Rnor\_CHD9 VEVDRLVLEVSFCEDKDTGESVYYLVKWCSLPYEDSTWELKEDVPLAKIEEFQEQASRPDTRQLDR  
Mmus\_CHD9 VEVDRLVLEVSFCEDKDTGESVYYLVKWCSLPYEDSTWELKEDVPLAKIEEFQEQASRPDTRHLDLDR

#### Helicase ATP-Binding (CHD9)

Hsap\_CHD9 LFNWYNRRNCILADEMGLGKTIQSITFLYEILLTGIRGPFLLIAPLSTIANWEREFRTWTDINVVVYHGSLISRQMIQQYEMYFRDSQGR  
Ptro\_CHD9 LFNWYNRRNCILADEMGLGKTIQSITFLYEILLTGIRGPFLLIAPLSTIANWEREFRTWTDINVVVYHGSLISRQMIQQYEMYFRDSQGR  
Mmul\_CHD9 LFNWYNRRNCILADEMGLGKTIQSITFLYEILLTGIRGPFLLIAPLSTIANWEREFRTWTDINVVVYHGSLISRQMIQQYEMYFRDSQGR  
Fcat\_CHD9 LFNWYNRRNCILADEMGLGKTIQSITFLYEILLTGIRGPFLLIAPLSTIANWEREFRTWTDINVVVYHGSLISRQMIQQYEMYFRDSQGR  
Rnor\_CHD9 LFNWYNRRNCILADEMGLGKTIQSITFLYEVLLTGIRGPFLLIAPLSTIANWEREFRTWTDINVVVYHGSLISRQMIQQYEMYFRDSQGR  
Mmus\_CHD9 LFNWYNRRNCILADEMGLGKTIQSITFLYEILLTGIRGPFLLIAPLSTIANWEREFRTWTDINVVVYHGSLISRQMIQQYEMYFRDSQGR

Hsap\_CHD9 IRGAYRFQAIITTFEMILGGCGELNAIEWRCVIIDEAHRLLNKNCKLLEGLKLMNLEHKVLLTGTPLQNTVEELFSLHFLLEPL  
Ptro\_CHD9 IRGAYRFQAIITTFEMILGGCGELNAIEWRCVIIDEAHRLLNKNCKLLEGLKLMNLEHKVLLTGTPLQNTVEELFSLHFLLEPL  
Mmul\_CHD9 IRGAYRFQAIITTFEMILGGCGELNAIEWRCVIIDEAHRLLNKNCKLLEGLKLMNLEHKVLLTGTPLQNTVEELFSLHFLLEPL  
Fcat\_CHD9 IRGAYRFQAIITTFEMILGGCGELNAIEWRCVIIDEAHRLLNKNCKLLEGLKLMNLEHKVLLTGTPLQNTVEELFSLHFLLEPL  
Rnor\_CHD9 IRGAYRFQAIITTFEMILGGCGELNAIEWRCVIIDEAHRLLNKNCKLLEGLKLMNLEHKVLLTGTPLQNTVEELFSLHFLLEPL  
Mmus\_CHD9 IRGAYRFQAIITTFEMILGGCGELNAIDWRCVIIDEAHRLLNKNCKLLEGLKLMNLEHKVLLTGTPLQNTVEELFSLHFLLEPL

#### Helicase C-Terminal (CHD9)

Hsap\_CHD9 LIDKLLPKMKAGGHKVLIFSQMVRCLDILEDYLIHKRYLYERIDGRVRGNLRQAAIDRFSPDSDRFVFLCTRAGGLGINLTAADTCIIF  
Ptro\_CHD9 LIDKLLPKMKAGGHKVLIFSQMVRCLDILEDYLIHKRYLYERIDGRVRGNLRQAAIDRFSPDSDRFVFLCTRAGGLGINLTAADTCIIF  
Mmul\_CHD9 LIDKLLPKMKAGGHKVLIFSQMVRCLDILEDYLIHKRYLYERIDGRVRGNLRQAAIDRFSPDSDRFVFLCTRAGGLGINLTAADTCIIF  
Fcat\_CHD9 LIDKLLPKMKAGGHKVLIFSQMVRCLDILEDYLIHKRYLYERIDGRVRGNLRQAAIDRFSPDSDRFVFLCTRAGGLGINLTAADTCIIF  
Rnor\_CHD9 LIDKLLPKMKAGGHKVLIFSQMVRCLDILEDYLIHKRYLYERIDGRVRGNLRQAAIDRFSPDSDRFVFLCTRAGGLGINLTAADTCIIF  
Mmus\_CHD9 LIDKLLPKMKAGGHKVLIFSQMVRCLDILEDYLIHKRYLYERIDGRVRGNLRQAAIDRFSPDSDRFVFLCTRAGGLGINLTAADTCIIF

Hsap\_CHD9 DSDWNPQNDLQAQARCHRIGQNKAVKVYRLVTRNSYEREMFDRASLKLGLDKAVLQSMGR  
Ptro\_CHD9 DSDWNPQNDLQAQARCHRIGQNKAVKVYRLVTRNSYEREMFDRASLKLGLDKAVLQSMGR  
Mmul\_CHD9 DSDWNPQNDLQAQARCHRIGQNKAVKVYRLVTRNSYEREMFDRASLKLGLDKAVLQSMGR  
Fcat\_CHD9 DSDWNPQNDLQAQARCHRIGQNKAVKVYRLVTRNSYEREMFDRASLKLGLDKAVLQSMGR  
Rnor\_CHD9 DSDWNPQNDLQAQARCHRIGQNKAVKVYRLVTRNSYEREMFDRASLKLGLDKAVLQSMGR  
Mmus\_CHD9 DSDWNPQNDLQAQARCHRIGQNKAVKVYRLVTRNSYEREMFDRASLKLGLDKAVLQSMGR

#### SANT (CHD9)

Hsap\_CHD9 RQQRWTRREEADFYRVVSTFGVVFPDRGQFDWTKFRAMARLHKKTDDSLSEKYLAFMSM  
Ptro\_CHD9 RQQRWTRREEADFYRVVSTFGVVFPDRGQFDWTKFRAMARLHKKTDDSLSEKYLAFMSM  
Mmul\_CHD9 RQQRWTRREEADFYRVVSTFGVVFPDRGQFDWTKFRAMARLHKKTDDSLSEKYLAFMSM  
Fcat\_CHD9 RQQRWTRREEADFYRVVSTFGVVFPDRGQFDWTKFRAMARLHKKTDDSLSEKYLAFMSM  
Rnor\_CHD9 RQQRWTRREEADFYRVVSTFGVVFPDRGQFDWTKFRALARLHKKTDDSLSEKYLAFMAM  
Mmus\_CHD9 RQQRWTRREEADFYRVVSTFGVVFPDRGQFDWTKFRALARLHKKTDDSLSEKYLAFMAM

#### BRK (CHD9)

Hsap\_CHD9 DTESPPVINLKDGTLAGDDAPKRKDLKWLKEHPGYVEDLGAFIPRMQ  
Ptro\_CHD9 DTESPPVINLKDGTLAGDDAPKRKDLKWLKEHPGYVEDLGAFIPRMQ  
Mmul\_CHD9 DTESPPVINLKDGTLAGDDAPKRKDLKWLKEHPGYVEDLGAFIPRMQ  
Fcat\_CHD9 DTESPPVINLKDGTLAGDDAPKRKDLKWLKEHPGYVEDLGAFIPRMQ  
Rnor\_CHD9 DTESPPVINLKDGTLAGDDAPKRKDLRWLKEHPGYVEDLGAFIPRVQ

Mmus\_CHD9 DTESPPVPVINKDGTSLAGDDAPKRKDLDRWLKEHPGYVEDLGAFIPRVQ

**BRK (CHD9)**

Hsap\_CHD9 TGEERVQLINRRNARKVGGAFAPPLKDLCRFLKENSEYGVAPPEWG  
Ptro\_CHD9 TGEERVQLINRRNARKVGGAFAPPLKDLCRFLKENSEYGVAPPEWG  
Mmul\_CHD9 TGEERVQLINRRNARKVGGAFAPPLKDLCRFLKENSEYGVAPPEWG  
Fcat\_CHD9 TGEERVQLINRRNARKVGGAFAPPLKDLCRFLKENSEYGVAPPEWG  
Rnor\_CHD9 TGEERVQLINRRNARKVGGAFAPPLKDLCRFLKENSEYGVAPPEWG  
Mmus\_CHD9 TGEERVQLINRRNARKVGGAFAPPLKDLCRFLKENSEYGVAPPEWG

**Figure S2-** Multiple sequence alignment of chromodomains helicase-DNA binding (CHD) protein orthologues (Hsap: *Homo sapiens*; Ptro: *Pan troglodytes*; Mmul: *Macaca mulatta*; Fcat: *Felis catus*; Rnor: *Rattus norvegicus*; Mmus: *Mus musculus*). The grey highlighting represents the variable amino acid positions. The yellow highlighting represents the chromoboxes in Chromo 1 and Chromo 2 and the motifs I, Ia, Ib, Ic, II, III, IV, IVa, V, Va, and VI in Helicase ATP-binding and Helicase C-terminal domains. Bold red residues represent pathogenic mutations retrieved from Clinvar [63] and also described in literature (Table 1).
